# Supplementary material for: Nature of S2Se2 σ(4c–6e) at naphthalene 1,8-positions and models, elucidated by QTAIM dual functional analysis
Source: Royal Society of Chemistry journal article supplement (doi:10.1039/c6ra17767k), 2016-01-01
Supplement: c6ra17767k1.pdf [file c6ra17767k1.pdf]

## Electronic Supplementary Information

### Nature of S<sub>2</sub>Se<sub>2</sub> σ(4c–6e) at naphthalene 1,8-positions and models, elucidated by QTAIM dual functional analysis

Waro Nakanishi,\* Yutaka Tsubomoto and Satoko Hayashi\*

Department of Material Science and Chemistry, Faculty of Systems Engineering, Wakayama University,  
930 Sakaedani, Wakayama, 640-8510 Japan

E-mail: nakanisi@sys.wakayama-u.ac.jp and hayashi3@sys.wakayama-u.ac.jp

#### QTAIM Dual Functional Analysis (QTAIM-DFA)

The bond critical point (BCP; \*) is an important concept in QTAIM. The BCP of  $(\omega, \sigma) = (3, -1)$ <sup>[S1]</sup> is a point along the bond path (BP) at the interatomic surface, where charge density  $\rho(\mathbf{r})$  reaches a minimum. It is denoted by  $\rho_b(\mathbf{r}_c)$ . While the chemical bonds or interactions between A and B are denoted by A–B, which correspond to BPs between A and B in QTAIM, A-\*–B emphasizes the presence of BCP (\*) in A–B.

The sign of the Laplacian  $\rho_b(\mathbf{r}_c)$  ( $\nabla^2\rho_b(\mathbf{r}_c)$ ) indicates that  $\rho_b(\mathbf{r}_c)$  is depleted or concentrated with respect to its surrounding, since  $\nabla^2\rho_b(\mathbf{r}_c)$  is the second derivative of  $\rho_b(\mathbf{r}_c)$ .  $\rho_b(\mathbf{r}_c)$  is locally depleted relative to the average distribution around  $\mathbf{r}_c$  if  $\nabla^2\rho_b(\mathbf{r}_c) > 0$ , but it is concentrated when  $\nabla^2\rho_b(\mathbf{r}_c) < 0$ . Total electron energy densities at BCPs ( $H_b(\mathbf{r}_c)$ ) must be a more appropriate measure for weak interactions on the energy basis.<sup>[S1–S6]</sup>  $H_b(\mathbf{r}_c)$  are the sum of kinetic energy densities ( $G_b(\mathbf{r}_c)$ ) and potential energy densities ( $V_b(\mathbf{r}_c)$ ) at BCPs, as shown in Eq. (S1). Electrons at BCPs are stabilized when  $H_b(\mathbf{r}_c) < 0$ , therefore, interactions exhibit the covalent nature in this region, whereas they exhibit no covalency if  $H_b(\mathbf{r}_c) > 0$ , due to the destabilization of electrons at BCPs under the conditions.<sup>[S1]</sup> Eq. (S2) represents the relation between  $\nabla^2\rho_b(\mathbf{r}_c)$  and  $H_b(\mathbf{r}_c)$ , together with  $G_b(\mathbf{r}_c)$  and  $V_b(\mathbf{r}_c)$ , which is closely related to the virial theorem.

$$H_b(\mathbf{r}_c) = G_b(\mathbf{r}_c) + V_b(\mathbf{r}_c) \quad (\text{S1})$$

$$(\hbar^2/8m)\nabla^2\rho_b(\mathbf{r}_c) = H_b(\mathbf{r}_c) - V_b(\mathbf{r}_c)/2 \quad (\text{S2})$$

$$= G_b(\mathbf{r}_c) + V_b(\mathbf{r}_c)/2 \quad (\text{S2}')$$

Interactions are classified by the signs of  $\nabla^2\rho_b(\mathbf{r}_c)$  and  $H_b(\mathbf{r}_c)$ . Interactions in the region of  $\nabla^2\rho_b(\mathbf{r}_c) < 0$  are called shared-shell (SS) interactions and they are closed-shell (CS) interactions for  $\nabla^2\rho_b(\mathbf{r}_c) > 0$ .  $H_b(\mathbf{r}_c)$  must be negative when  $\nabla^2\rho_b(\mathbf{r}_c) < 0$ , since  $H_b(\mathbf{r}_c)$  are larger than  $(\hbar^2/8m)\nabla^2\rho_b(\mathbf{r}_c)$  by  $V_b(\mathbf{r}_c)/2$  with negative  $V_b(\mathbf{r}_c)$  at all BCPs (Eq. (S2)). Consequently,  $\nabla^2\rho_b(\mathbf{r}_c) < 0$  and  $H_b(\mathbf{r}_c) < 0$  for the SS interactions. The CS interactions are especially called *pure* CS interactions for  $H_b(\mathbf{r}_c) > 0$  and  $\nabla^2\rho_b(\mathbf{r}_c) > 0$ , since electrons at BCPs are depleted and destabilized under the conditions.<sup>[S1a]</sup> Electrons in the intermediate region between SS and *pure* CS, which belong to CS, are locally depleted but stabilized at BCPs, since  $\nabla^2\rho_b(\mathbf{r}_c) > 0$  but  $H_b(\mathbf{r}_c) < 0$ .<sup>[S1a]</sup> We call the interactions in this region *regular* CS,<sup>[S4,S5]</sup> when it is necessary to distinguish

from *pure* CS. The role of  $\nabla^2\rho_b(\mathbf{r}_c)$  in the classification can be replaced by  $H_b(\mathbf{r}_c) - V_b(\mathbf{r}_c)/2$ , since  $(\hbar^2/8m)\nabla^2\rho_b(\mathbf{r}_c) = H_b(\mathbf{r}_c) - V_b(\mathbf{r}_c)/2$  (Eq. (S2)).

We proposed QTAIM-DFA by plotting  $H_b(\mathbf{r}_c)$  versus  $H_b(\mathbf{r}_c) - V_b(\mathbf{r}_c)/2 (= (\hbar^2/8m)\nabla^2\rho_b(\mathbf{r}_c))$ ,<sup>[S4a]</sup> after the proposal of  $H_b(\mathbf{r}_c)$  versus  $\nabla^2\rho_b(\mathbf{r}_c)$ .<sup>[S4b]</sup> Both axes in the plot of the former are given in energy unit, therefore, distances on the  $(x, y) (= (H_b(\mathbf{r}_c) - V_b(\mathbf{r}_c)/2, H_b(\mathbf{r}_c)))$  plane can be expressed in the energy unit, which provides an analytical development. QTAIM-DFA can incorporate the classification of interactions by the signs of  $\nabla^2\rho_b(\mathbf{r}_c)$  and  $H_b(\mathbf{r}_c)$ . Scheme S1 summarizes the QTAIM-DFA treatment. Interactions of *pure* CS appear in the first quadrant, those of *regular* CS in the fourth quadrant and SS interactions do in the third quadrant. No interactions appear in the second one.

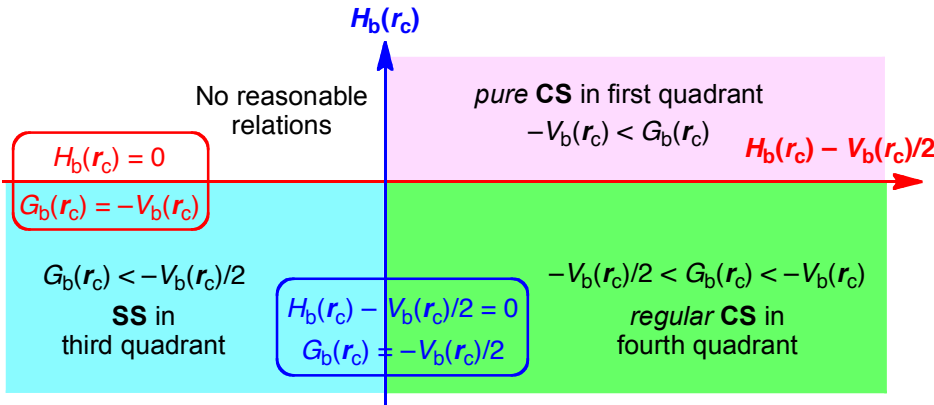

**Scheme S1.** QTAIM-DFA: Plot of  $H_b(\mathbf{r}_c)$  versus  $H_b(\mathbf{r}_c) - V_b(\mathbf{r}_c)/2$  for weak to strong interactions.

In our treatment, data for perturbed structures around fully optimized structures are also employed for the plots, together with the fully optimized ones (see Figure S1).<sup>[S4-S6]</sup> We proposed the concept of the "dynamic nature of interaction" originated from the perturbed structures. The behavior of interactions at the fully optimized structures corresponds to "the static nature of interactions", whereas that containing perturbed structures exhibit the "dynamic nature of interaction" as explained below. The method to generate the perturbed structures is discussed later. Plots of  $H_b(\mathbf{r}_c)$  versus  $H_b(\mathbf{r}_c) - V_b(\mathbf{r}_c)/2$  are analyzed employing the polar coordinate  $(R, \theta)$  representation with  $(\theta_p, \kappa_p)$  parameters.<sup>[S4a,S5,S6]</sup> Figure S1 explains the treatment.  $R$  in  $(R, \theta)$  is defined by Eq. (S3) and given in the energy unit.  $R$  corresponds to the energy for an interaction at BCP. The plots show a spiral stream, as a whole.  $\theta$  in  $(R, \theta)$  defined by Eq. (S4), measured from the  $y$ -axis, controls the spiral stream of the plot. Each plot for an interaction shows a specific curve, which provides important information of the interaction (see Figure S1). The curve is expressed by  $\theta_p$  and  $\kappa_p$ . While  $\theta_p$ , defined by Eq. (S5) and measured from the  $y$ -direction, corresponds to the tangent line of a plot, where  $\theta_p$  is calculated employing data of the perturbed structures with a fully-optimized structure and  $\kappa_p$  is the curvature of the plot (Eq. (S6)). While  $(R, \theta)$  correspond to the static nature,  $(\theta_p, \kappa_p)$  represent the dynamic nature of interactions. We call  $(R, \theta)$  and  $(\theta_p, \kappa_p)$  QTAIM-DFA parameters, whereas  $\rho_b(\mathbf{r}_c)$ ,  $\nabla^2\rho_b(\mathbf{r}_c)$ ,  $G_b(\mathbf{r}_c)$ ,  $V_b(\mathbf{r}_c)$ ,  $H_b(\mathbf{r}_c)$  and  $H_b(\mathbf{r}_c) - V_b(\mathbf{r}_c)/2$  belong to QTAIM functions.  $k_b(\mathbf{r}_c)$ , defined by Eq. (S7), is a QTAIM function but it will be treated as if it were a QTAIM-DFA parameter, if suitable.

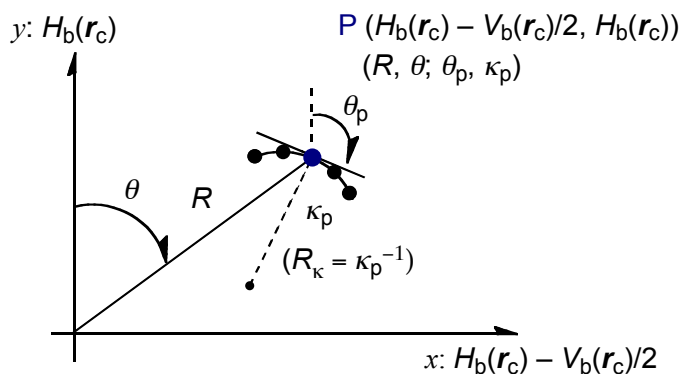

**Figure S1.** Polar  $(R, \theta)$  coordinate representation of  $H_b(\mathbf{r}_c)$  versus  $H_b(\mathbf{r}_c) - V_b(\mathbf{r}_c)/2$ , with  $(\theta_p, \kappa_p)$  parameters.

$$R = (x^2 + y^2)^{1/2} \quad (\text{S3})$$

$$\theta = 90^\circ - \tan^{-1}(y/x) \quad (\text{S4})$$

$$\theta_p = 90^\circ - \tan^{-1}(dy/dx) \quad (\text{S5})$$

$$\kappa_p = |d^2y/dx^2|/[1 + (dy/dx)^2]^{3/2} \quad (\text{S6})$$

$$k_b(\mathbf{r}_c) = V_b(\mathbf{r}_c)/G_b(\mathbf{r}_c) \quad (\text{S7})$$

where  $(x, y) = (H_b(\mathbf{r}_c) - V_b(\mathbf{r}_c)/2, H_b(\mathbf{r}_c))$

### Criteria for Classification of Interactions: Behavior of Typical Interactions Elucidated by QTAIM-DFA

$H_b(\mathbf{r}_c)$  are plotted versus  $H_b(\mathbf{r}_c) - V_b(\mathbf{r}_c)/2$  for typical interactions in vdW (van der Waals interactions), HB (hydrogen bonds), CT-MC (molecular complexes through charge transfer),  $X_3^-$  (trihalide ions), CT-TBP (trigonal bipyramidal adducts through charge-transfer), Cov-w (weak covalent bonds) and Cov-s (strong covalent bonds).<sup>[S4-S6]</sup> Rough criteria are obtained, after the analysis of the plots for the typical interactions according to Eqs. (S3)–(S7), by applying QTAIM-DFA. Scheme S2 shows the rough criteria, which are accomplished by the  $\theta$  and  $\theta_p$  values, together with the values of  $k_b(\mathbf{r}_c)$ . The criteria will be employed to discuss the nature of interactions in question, as a reference.

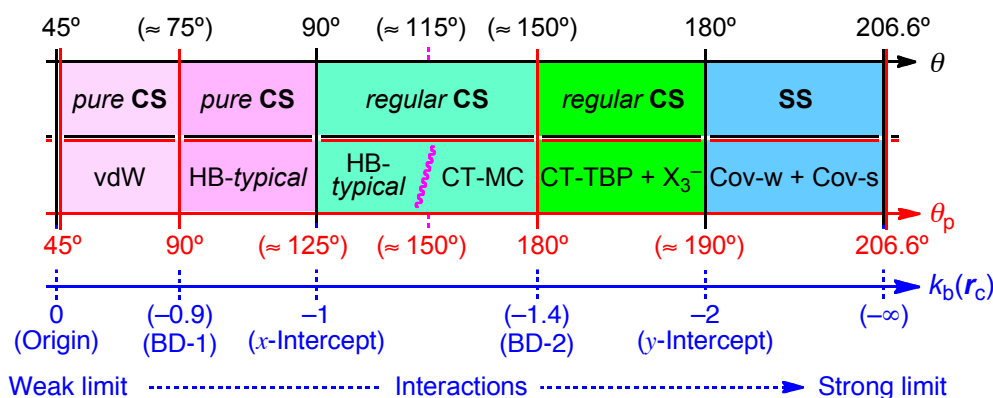

**Scheme S2.** Rough classification of interactions by  $\theta$  and  $\theta_p$ , together with  $k_b(\mathbf{r}_c)$  ( $= V_b(\mathbf{r}_c)/G_b(\mathbf{r}_c)$ ).

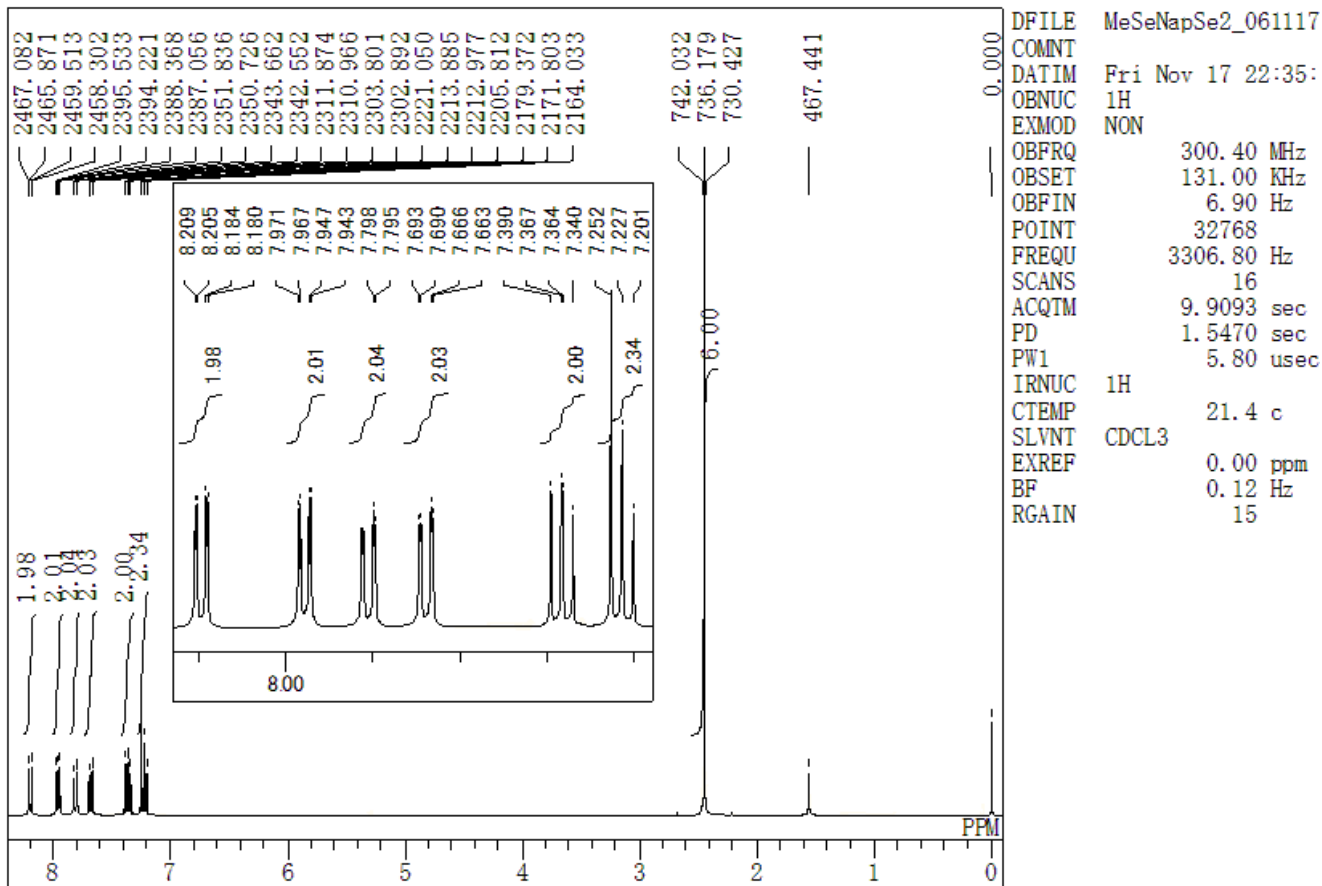

Figure S2.  $^1\text{H}$  NMR spectrum of 4.

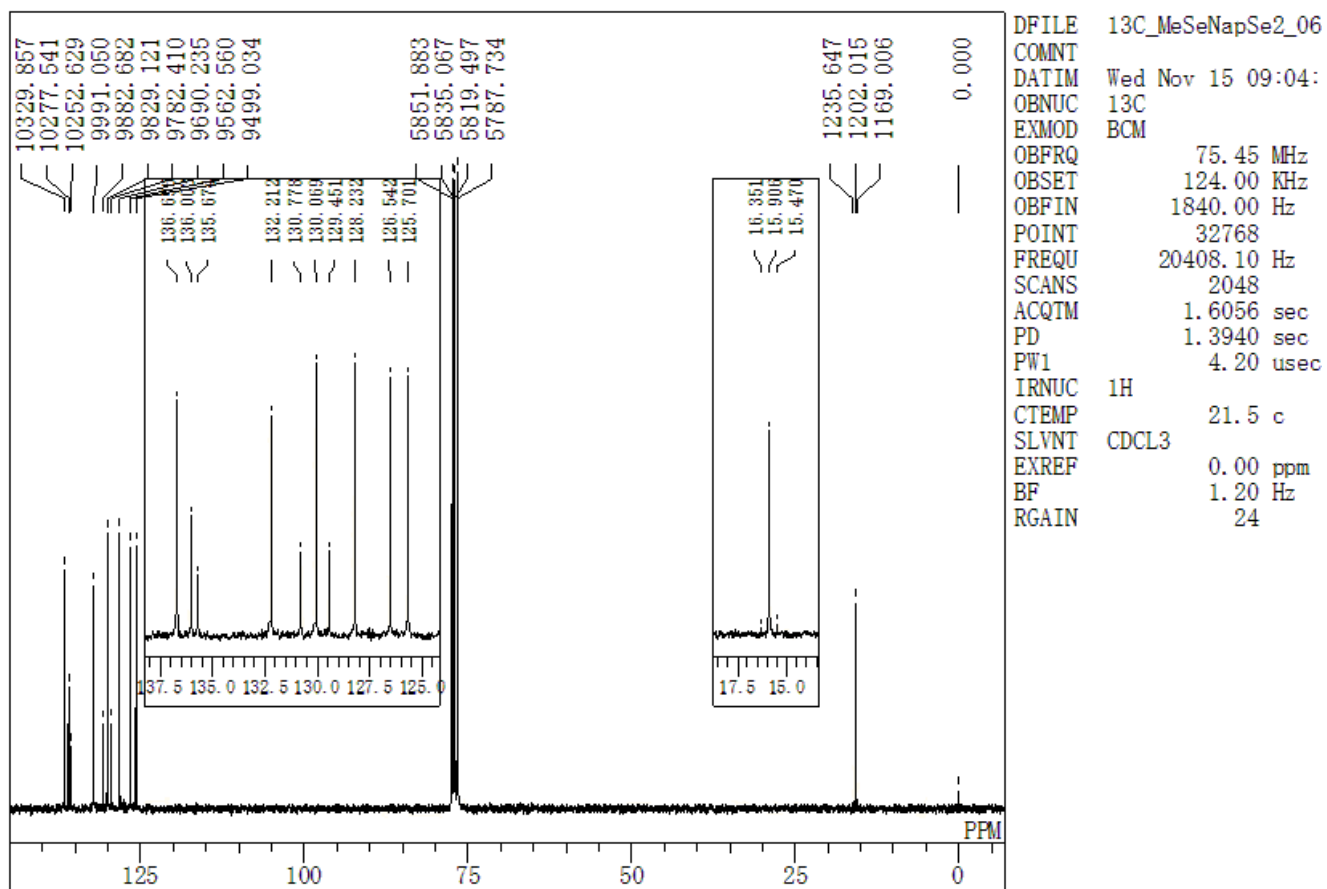

Figure S3.  $^{13}\text{C}$  NMR spectrum of 4.

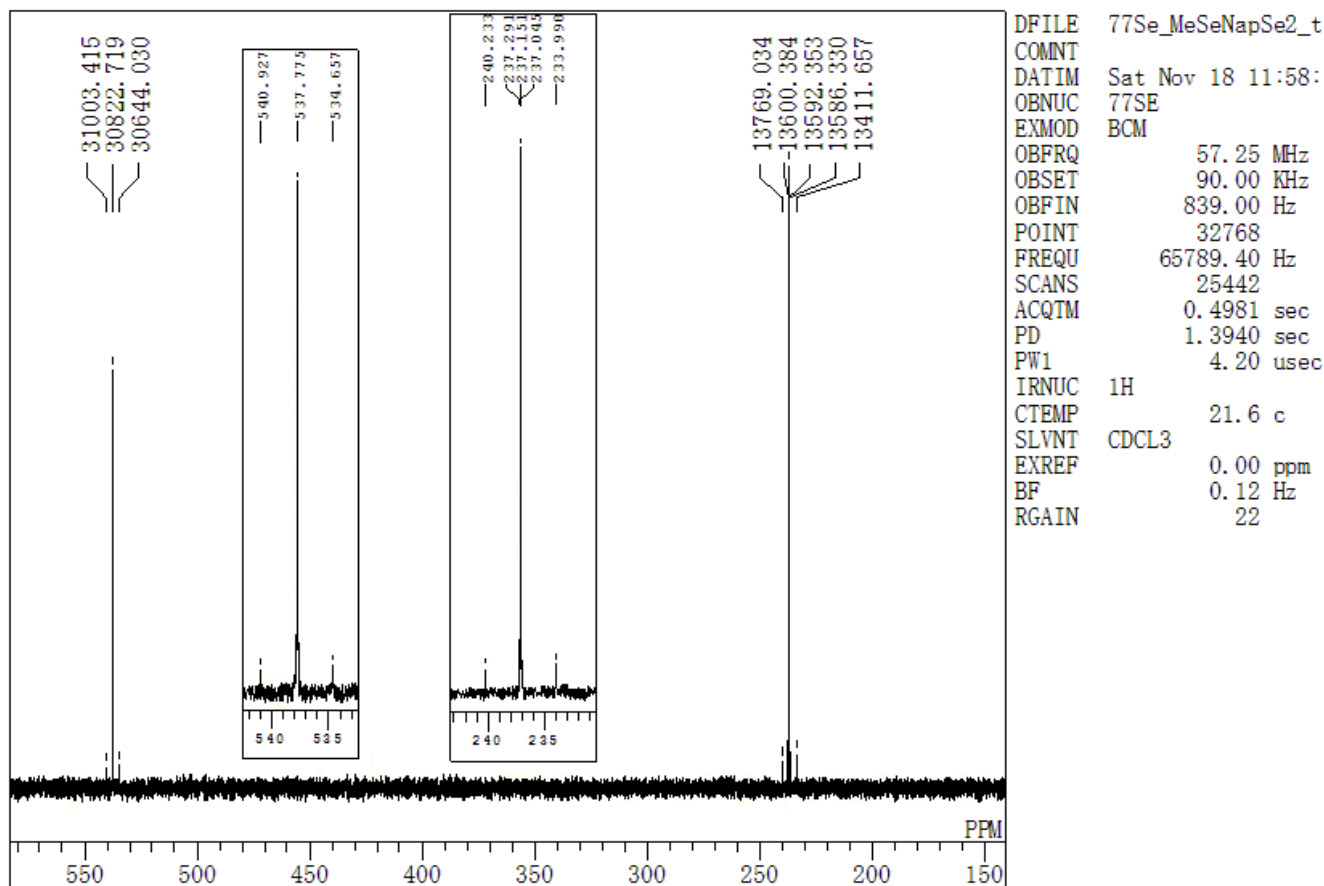

**Figure S4.**  $^{77}\text{Se}$  NMR spectrum of **4**.

**Table S1.** Structural parameters evaluated for **1–4** with MP2/BSS-A and MP2/BS-B, together with the observed values for **4** and **I**.<sup>[a,b]</sup>

| Species ( $^{\text{A}}\text{E}, ^{\text{B}}\text{E}$ )<br>(symmetry) | $r_{\text{o}}(^{\text{A}}\text{E}, ^{\text{A}}\text{E})$<br>(Å) | $r_{\text{o}}(^{\text{A}}\text{E}, ^{\text{B}}\text{E})$<br>(Å) | $\Delta r_{\text{o}}(^{\text{A}}\text{E}, ^{\text{B}}\text{E})$ <sup>[c]</sup><br>(Å) | $\angle \text{C}_1^{\text{A}}\text{E}^{\text{A}}\text{E}$<br>(°) | $\angle \text{C}_8^{\text{B}}\text{E}\text{C}_{11}$<br>(°) | $\angle ^{\text{B}}\text{E}^{\text{A}}\text{E}^{\text{A}}\text{E}$<br>(°) | $\phi_1$ <sup>[d]</sup><br>(°) | $\phi_2$ <sup>[e]</sup><br>(°) |
|----------------------------------------------------------------------|-----------------------------------------------------------------|-----------------------------------------------------------------|---------------------------------------------------------------------------------------|------------------------------------------------------------------|------------------------------------------------------------|---------------------------------------------------------------------------|--------------------------------|--------------------------------|
| MP2/BSS-A                                                            |                                                                 |                                                                 |                                                                                       |                                                                  |                                                            |                                                                           |                                |                                |
| <b>1</b> (S, S) ( $\text{C}_1$ )                                     | 2.0559                                                          | 2.9418                                                          | -0.66                                                                                 | 104.9                                                            | 99.6                                                       | 171.4                                                                     | 83.7                           | 75.5                           |
| <b>2</b> (S, Se) ( $\text{C}_2$ )                                    | 2.0603                                                          | 3.0255                                                          | -0.67                                                                                 | 104.6                                                            | 97.0                                                       | 170.2                                                                     | 85.7                           | 69.9                           |
| <b>3</b> (Se, S) ( $\text{C}_2$ )                                    | 2.3440                                                          | 2.9556                                                          | -0.74                                                                                 | 101.9                                                            | 99.4                                                       | 177.8                                                                     | 83.3                           | 73.7                           |
| <b>4</b> (Se, Se) ( $\text{C}_2$ )                                   | 2.3532                                                          | 3.0353                                                          | -0.76                                                                                 | 101.6                                                            | 96.6                                                       | 176.9                                                                     | 85.1                           | 68.3                           |
| MP2/BSS-B                                                            |                                                                 |                                                                 |                                                                                       |                                                                  |                                                            |                                                                           |                                |                                |
| <b>1</b> (S, S) ( $\text{C}_1$ )                                     | 2.0937                                                          | 2.9419                                                          | -0.66                                                                                 | 104.7                                                            | 99.5                                                       | 171.7                                                                     | 83.9                           | 74.9                           |
| <b>2</b> (S, Se) ( $\text{C}_2$ )                                    | 2.0990                                                          | 3.0293                                                          | -0.67                                                                                 | 104.3                                                            | 96.8                                                       | 170.5                                                                     | 86.0                           | 69.5                           |
| <b>3</b> (Se, S) ( $\text{C}_2$ )                                    | 2.3744                                                          | 2.9682                                                          | -0.73                                                                                 | 101.9                                                            | 99.3                                                       | 178.0                                                                     | 83.4                           | 73.3                           |
| <b>4</b> (Se, Se) ( $\text{C}_2$ )                                   | 2.3839                                                          | 3.0540                                                          | -0.75                                                                                 | 101.6                                                            | 96.5                                                       | 177.1                                                                     | 84.9                           | 67.9                           |
| Observed Value                                                       |                                                                 |                                                                 |                                                                                       |                                                                  |                                                            |                                                                           |                                |                                |
| <b>4</b> (Se, Se) <sup>[f]</sup>                                     | 2.3864(4)                                                       | 3.030                                                           | -0.77                                                                                 | 102.64(6)                                                        | 96.98(9) <sup>[g]</sup>                                    | 173.3                                                                     | 79.1                           | 78.7 <sup>[h]</sup>            |
| <b>I</b> (S, S)                                                      | 2.055(2)                                                        | 2.988(2)                                                        | -0.61                                                                                 | 104.9 <sup>[i]</sup>                                             | 102.8 <sup>[g,h]</sup>                                     | 167.3 <sup>[i]</sup>                                                      | -89.0                          | 76.4 <sup>[h,i]</sup>          |
| <b>I</b> (S, Se)                                                     | 2.0706                                                          | 3.0560 <sup>[i]</sup>                                           | -0.64                                                                                 | 104.2 <sup>[i]</sup>                                             | 99.2 <sup>[g,h]</sup>                                      | 168.1 <sup>[i]</sup>                                                      | -81.3                          | 70.8 <sup>[h,i]</sup>          |
| <b>I</b> (Se, S)                                                     | 2.3561                                                          | 2.9809 <sup>[i]</sup>                                           | -0.72                                                                                 | 101.8 <sup>[i]</sup>                                             | 102.3 <sup>[g,h]</sup>                                     | 174.4 <sup>[i]</sup>                                                      | -91.5                          | 76.6 <sup>[h,i]</sup>          |
| <b>I</b> (Se, Se)                                                    | 2.365(1)                                                        | 3.053(1) <sup>[i]</sup>                                         | -0.75                                                                                 | 102.4 <sup>[i]</sup>                                             | 100.3 <sup>[g,h]</sup>                                     | 173.8 <sup>[i]</sup>                                                      | 91.4(4)                        | 73.1 <sup>[h,i]</sup>          |

[a] BSS-A: the 6-311+G(3df) basis sets being employed for S and Se with the 6-311G(d) basis sets for C and H. [b] BSS-B: the 6-311+G(3d) basis sets being employed for S and Se with the 6-311G(d) basis sets for C and H. [c]  $\Delta r_{\text{o}}(^{\text{A}}\text{E}, ^{\text{B}}\text{E}) = r_{\text{o}}(^{\text{A}}\text{E}, ^{\text{B}}\text{E}) - \sum r_{\text{vdW}}(^{\text{A}}\text{E}, ^{\text{B}}\text{E})$ , where  $r_{\text{vdW}}(\text{S}) = 1.80$  Å and  $r_{\text{vdW}}(\text{Se}) = 1.90$  Å (ref. 37 in the text). [d]  $\phi_1 = \phi(\text{C}_1^{\text{A}}\text{E}^{\text{A}}\text{E}\text{C}_1)$ . [e]  $\phi_2 = \phi(\text{C}_9\text{C}_8^{\text{B}}\text{E}\text{C}_{11})$ . [f] Prepared and measured in this work. [g]  $\angle \text{C}_8^{\text{B}}\text{E}\text{C}_i$ . [h]  $\phi_2 = \phi(\text{C}_9\text{C}_8^{\text{B}}\text{E}\text{C}_i)$ . [i] Averaged value.

**Table S2.** Structural parameters evaluated for models **A–D** with MP2/BSS-C.<sup>[a]</sup>

| Species<br>( <sup>A</sup> E, <sup>B</sup> E) | $r_o(^A\text{E}, ^A\text{E})$<br>(Å) | $r_o(^A\text{E}, ^B\text{E})$<br>(Å) | $\Delta r_o(^A\text{E}, ^B\text{E})^{[b]}$<br>(Å) | $\angle A^B E^A E^{[c]}$<br>(°) | $\angle B^A E^A E$<br>(°) | $\phi_1^{[d]}$<br>(°) | $\phi_2^{[e]}$<br>(°) | $\Delta E_{\text{ES}}$<br>(kJ mol <sup>-1</sup> ) | $\Delta E_{\text{ZP}}$<br>(kJ mol <sup>-1</sup> ) |
|----------------------------------------------|--------------------------------------|--------------------------------------|---------------------------------------------------|---------------------------------|---------------------------|-----------------------|-----------------------|---------------------------------------------------|---------------------------------------------------|
| model <b>A</b> ( $C_2$ )                     |                                      |                                      |                                                   |                                 |                           |                       |                       |                                                   |                                                   |
| (S, S)                                       | 2.0590                               | 3.5251                               | -0.07                                             | 74.2                            | 167.9                     | -90.5                 | -128.8                | -21.7                                             | -15.9                                             |
| (S, Se)                                      | 2.0601                               | 3.6334                               | -0.07                                             | 74.1                            | 167.9                     | -90.5                 | -129.4                | -21.3                                             | -16.1                                             |
| (Se, S)                                      | 2.3408                               | 3.5791                               | -0.12                                             | 80.7                            | 169.2                     | -90.3                 | -131.3                | -21.6                                             | -16.4                                             |
| (Se, Se)                                     | 2.3425                               | 3.6894                               | -0.11                                             | 80.7                            | 169.0                     | -90.3                 | -131.8                | -21.3                                             | -16.6                                             |
| model <b>B</b> ( $C_2$ )                     |                                      |                                      |                                                   |                                 |                           |                       |                       |                                                   |                                                   |
| (S, S)                                       | 2.0332                               | 3.6907                               | 0.09                                              | 55.1                            | 171.0                     | -84.7                 | -116.9                | -24.2                                             | -18.4                                             |
| (S, Se)                                      | 2.0336                               | 3.7981                               | 0.10                                              | 54.7                            | 170.6                     | -84.8                 | -116.5                | -24.4                                             | -19.4                                             |
| (Se, S)                                      | 2.3004                               | 3.7302                               | 0.03                                              | 60.6                            | 176.1                     | -85.4                 | -122.1                | -25.0                                             | -19.2                                             |
| (Se, Se)                                     | 2.3011                               | 3.8281                               | 0.03                                              | 58.5                            | 175.7                     | -85.4                 | -120.9                | -25.5                                             | -20.6                                             |
| model <b>C</b> ( $C_2$ )                     |                                      |                                      |                                                   |                                 |                           |                       |                       |                                                   |                                                   |
| (S, S)                                       | 2.0695                               | 3.2537                               | -0.35                                             | 85.4                            | 173.7                     | -90.5                 | -118.3                | -41.4                                             | -36.7                                             |
| (S, Se)                                      | 2.0720                               | 3.3302                               | -0.37                                             | 83.7                            | 175.5                     | -90.4                 | -130.8                | -43.2                                             | -39.0                                             |
| (Se, S)                                      | 2.3412                               | 3.2707                               | -0.43                                             | 87.9                            | 174.4                     | -90.4                 | -120.4                | -45.0                                             | -41.0                                             |
| (Se, Se)                                     | 2.3444                               | 3.3654                               | -0.43                                             | 86.9                            | 172.0                     | -90.4                 | -103.6                | -46.2                                             | -42.4                                             |
| model <b>D</b> ( $C_2$ )                     |                                      |                                      |                                                   |                                 |                           |                       |                       |                                                   |                                                   |
| (S, S)                                       | 2.0407                               | 3.4434                               | -0.16                                             | 83.6                            | 167.0                     | -84.4                 | -107.4                | -41.6                                             | -37.8                                             |
| (S, Se)                                      | 2.0416                               | 3.5215                               | -0.18                                             | 80.2                            | 167.0                     | -84.4                 | -114.7                | -43.4                                             | -39.9                                             |
| (Se, S)                                      | 2.3123                               | 3.4081                               | -0.29                                             | 87.0                            | 169.5                     | -84.9                 | -94.7                 | -46.5                                             | -42.9                                             |
| (Se, Se)                                     | 2.3127                               | 3.5190                               | -0.28                                             | 82.5                            | 164.4                     | -84.6                 | -82.6                 | -48.2                                             | -45.0                                             |

[a] BSS-C: the 6-311+G(3df) basis sets being employed for S and Se with the 6-311G(d,p) basis sets for C and H. [b]  $\Delta r_o(^A\text{E}, ^B\text{E}) = r_o(^A\text{E}, ^B\text{E}) - \Sigma r_{\text{vdW}}(^A\text{E}, ^B\text{E})$ , where  $r_{\text{vdW}}(\text{S}) = 1.80$  Å and  $r_{\text{vdW}}(\text{Se}) = 1.90$  Å (ref. 37 in the text). [c] A = H or C<sub>Me</sub>. [d]  $\phi_1 = \phi(\text{H}^A\text{E}^A\text{EH}$  or  $\text{C}_{\text{Me}}^A\text{E}^A\text{EC}_{\text{Me}})$ . [e]  $\phi_2 = \phi(\text{H}^B\text{E}^A\text{EH}$ ,  $\text{H}^B\text{E}^A\text{EC}_{\text{Me}}$ ,  $\text{C}_{\text{Me}}^B\text{E}^A\text{EH}$ , or  $\text{C}_{\text{Me}}^B\text{E}^A\text{EC}_{\text{Me}})$ .

**Table S3.** Results of NBO analysis for the <sup>A</sup>E---<sup>B</sup>E interactions in **1–4** with M06-2X/BSS-A//MP2/BSS-A and models **A–D** with MP2/BSS-C//MP2/BSS-C.<sup>[a]</sup>

| Compound<br>( <sup>A</sup> E, <sup>B</sup> E) | $E(2)^{[b,c]}$<br>([f]) | $E(2)^{[b,c]}$<br>([g]) | $[E(i) - E(j)]^{[d]}$<br>(au) | $F(i,j)^{[e]}$<br>(au) | Compound<br>( <sup>A</sup> E, <sup>B</sup> E) | $E(2)^{[b,c]}$<br>([f]) | $E(2)^{[b,c]}$<br>([g]) | $[E(i) - E(j)]^{[d]}$<br>(au) | $F(i,j)^{[e]}$<br>(au) |
|-----------------------------------------------|-------------------------|-------------------------|-------------------------------|------------------------|-----------------------------------------------|-------------------------|-------------------------|-------------------------------|------------------------|
| <b>1</b> (S, S)                               | 8.83                    | 36.9                    | 0.40                          | 0.053                  | <b>2</b> (S, Se)                              | 9.40                    | 39.3                    | 0.38                          | 0.054                  |
| <b>3</b> (Se, S)                              | 15.19                   | 63.6                    | 0.35                          | 0.066                  | <b>4</b> (Se, Se)                             | 16.97                   | 71.0                    | 0.33                          | 0.067                  |
| <b>A</b> (S, S)                               | 1.88                    | 7.9                     | 0.43                          | 0.025                  | <b>A</b> (S, Se)                              | 1.96                    | 8.2                     | 0.41                          | 0.025                  |
| <b>A</b> (Se, S)                              | 2.99                    | 12.5                    | 0.37                          | 0.030                  | <b>A</b> (Se, Se)                             | 3.12                    | 13.1                    | 0.36                          | 0.030                  |
| <b>B</b> (S, S)                               | 0.52                    | 2.2                     | 0.45                          | 0.014                  | <b>B</b> (Se, S)                              | 0.51                    | 2.1                     | 0.44                          | 0.013                  |
| <b>B</b> (Se, S)                              | 1.02                    | 4.3                     | 0.40                          | 0.018                  | <b>B</b> (Se, Se)                             | 1.01                    | 4.2                     | 0.39                          | 0.018                  |
| <b>C</b> (S, S)                               | 4.30                    | 18.0                    | 0.39                          | 0.037                  | <b>C</b> (Se, S)                              | 5.01                    | 21.0                    | 0.38                          | 0.039                  |
| <b>C</b> (Se, S)                              | 6.73                    | 28.2                    | 0.34                          | 0.043                  | <b>C</b> (Se, Se)                             | 7.32                    | 30.6                    | 0.33                          | 0.044                  |
| <b>D</b> (S, S)                               | 1.88                    | 7.9                     | 0.41                          | 0.025                  | <b>D</b> (Se, S)                              | 2.15                    | 9.0                     | 0.39                          | 0.026                  |
| <b>D</b> (Se, S)                              | 3.68                    | 15.4                    | 0.36                          | 0.032                  | <b>D</b> (Se, Se)                             | 3.61                    | 15.1                    | 0.34                          | 0.031                  |

[a] M06-2X/BSS-A//MP2/BSS-A was applied to **1–4**, since the calculations stopped before the end of the evaluations, if MP/BSS-A//MP2/BSS-A was employed. [b] Second-order perturbation energy. [c] Only one side of energy is shown. [d] Donor orbital of NBO(*i*) is  $n_p(^A\text{E})$  and acceptor orbital of NBO(*j*) corresponds to  $\sigma^*(^A\text{E}-^A\text{E})$ . [e] Fock matrix. [f] In kcal mol<sup>-1</sup>. [g] In kJ mol<sup>-1</sup>.

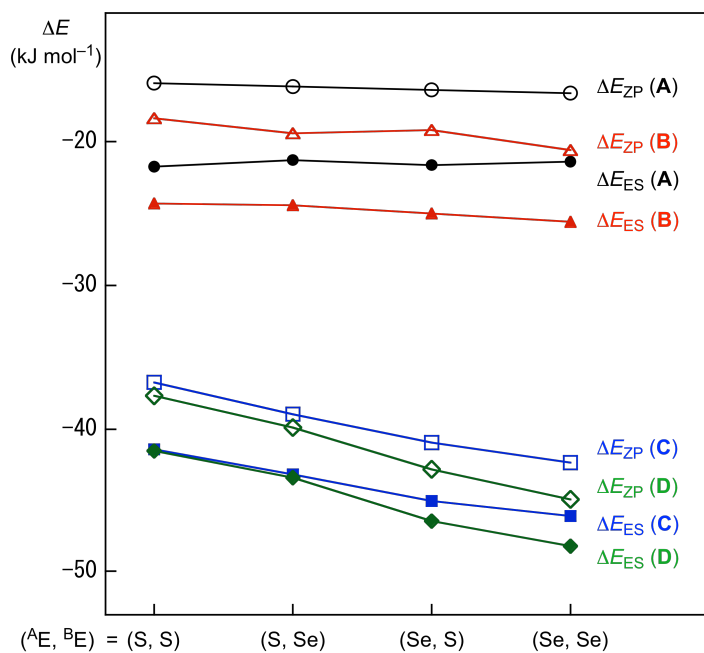

**Figure S5.** Plots of  $\Delta E_{ES}$  and  $\Delta E_{ZP}$  for models A–D.

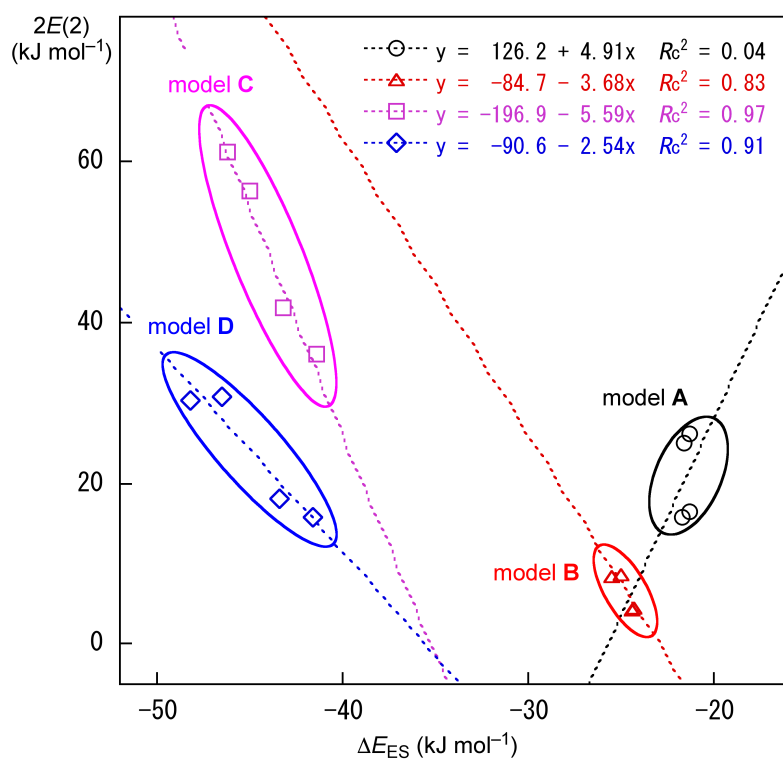

**Figure S6.** Plot of  $2E(2)$  versus  $\Delta E_{ES}$  for models A–D.

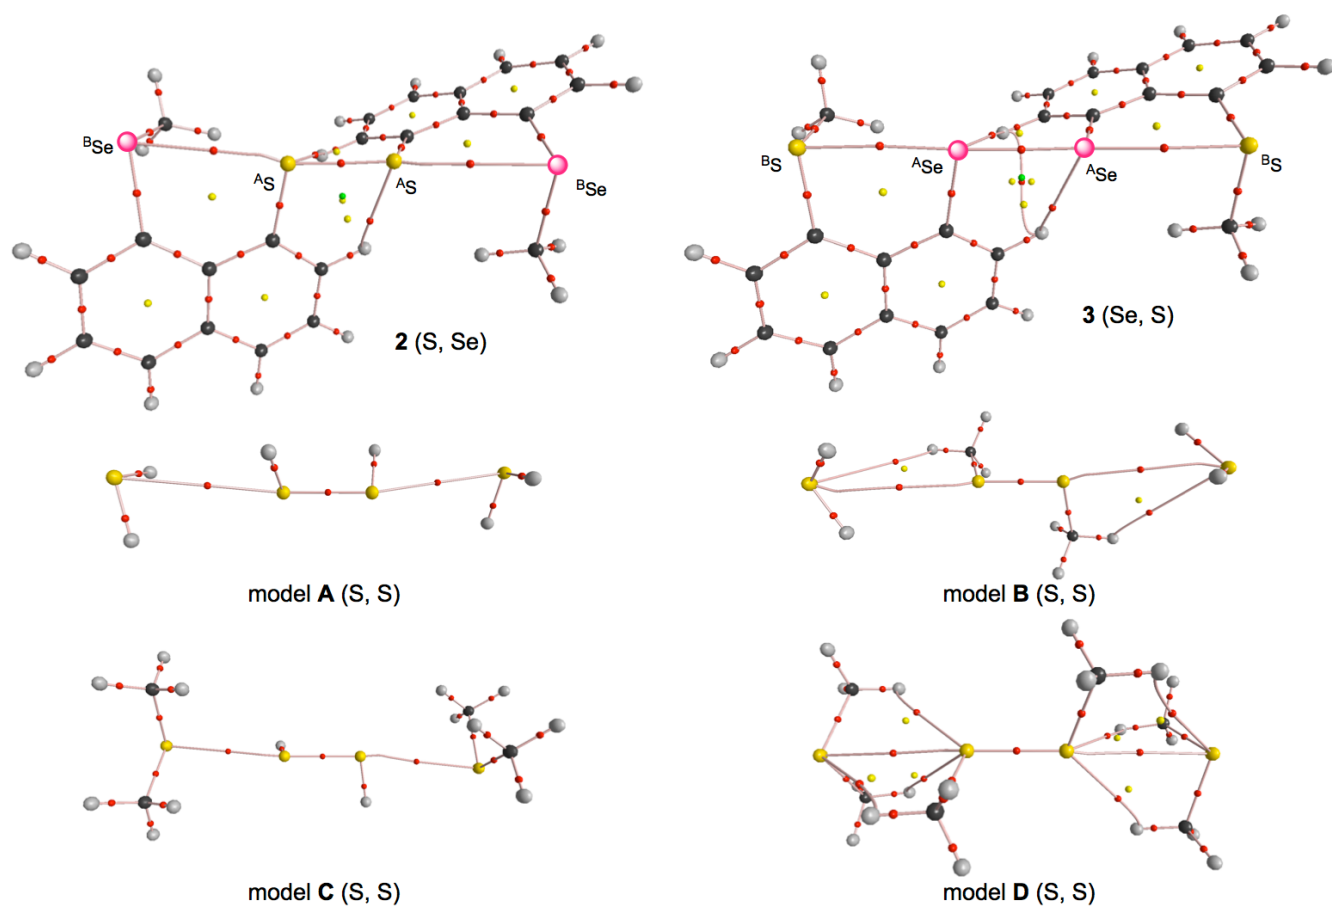

**Figure S7.** Molecular graphs for **2**, **3** and models **A** (S, S)–**D** (S, S), evaluated with MP2/6-311G(3d). BCPs are shown by red dots (●), RCPs by yellow dots (●) and CCPs by green dots (●), together with BPs by pink lines (—●—). Carbon atoms are drawn in black (●), hydrogen atoms in gray (●), sulfur atoms in yellow (●), and selenium atoms in pink (●).



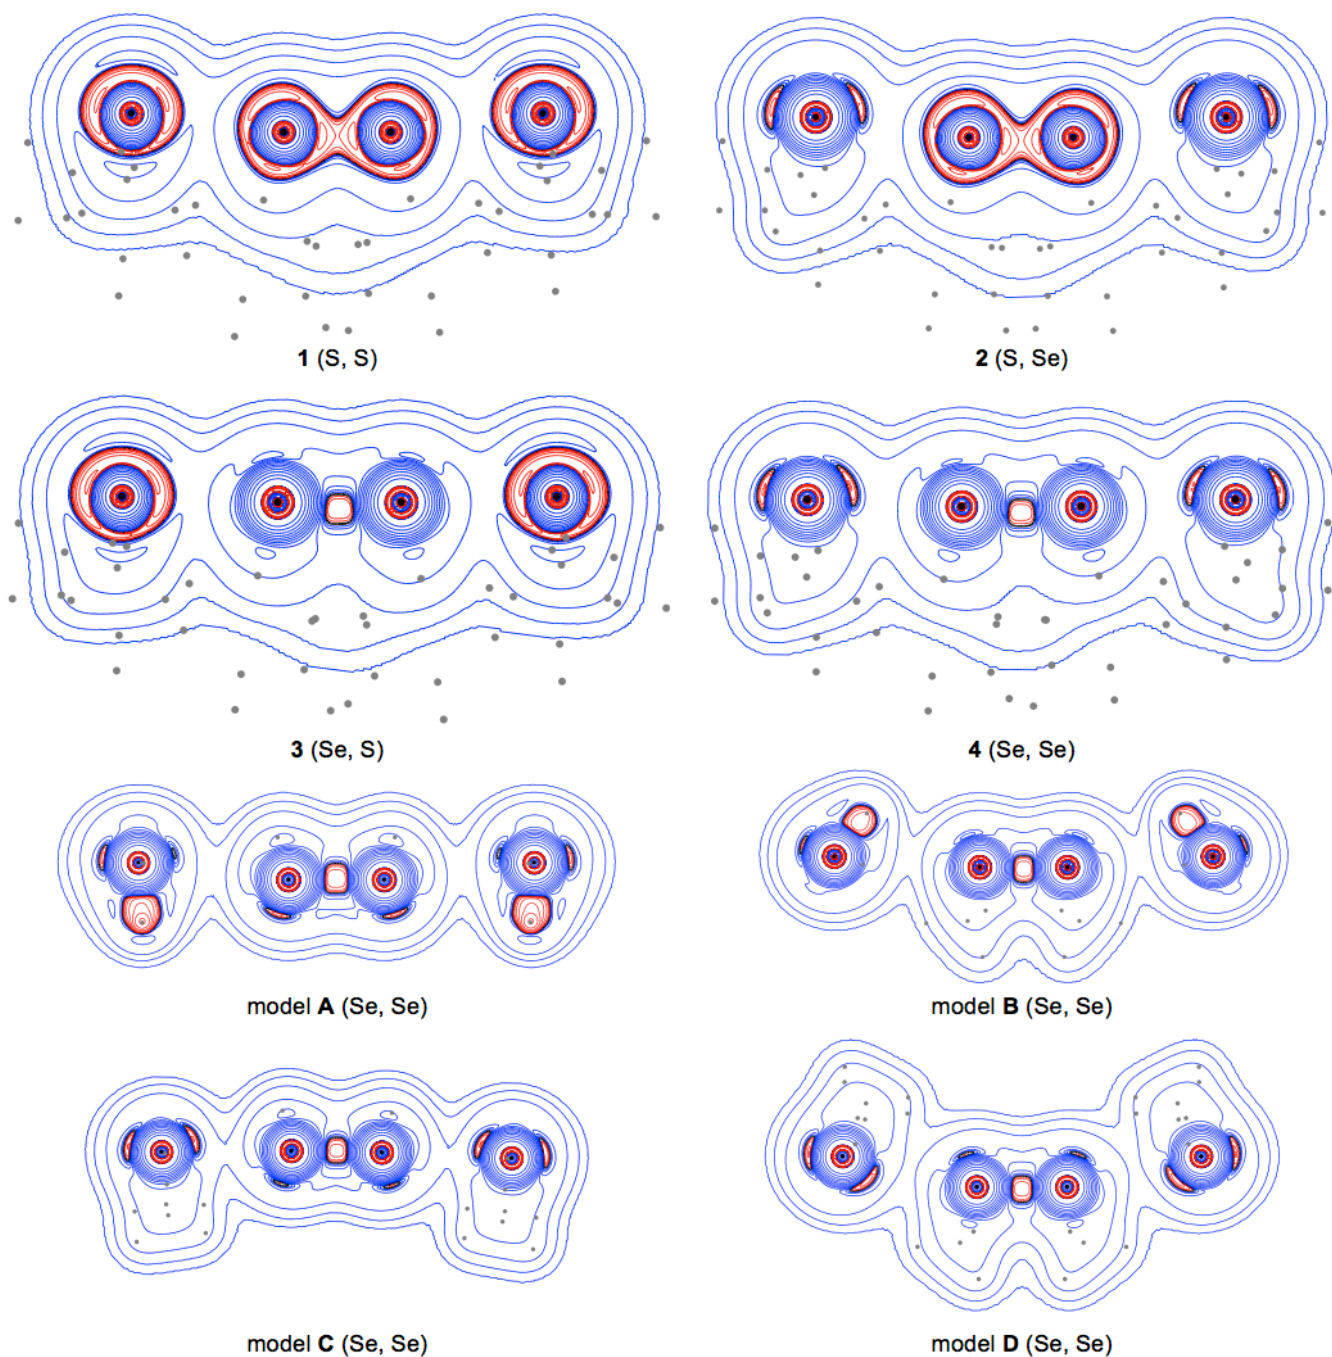

**Figure S8.** Negative Laplacians for 1–4 and models A (Se, Se)–D (Se, Se) drawn with MP2/6-311G(d), similarly to the case of Figure 4 in the text. Blue and red lines correspond to the positive and negative values, respectively.

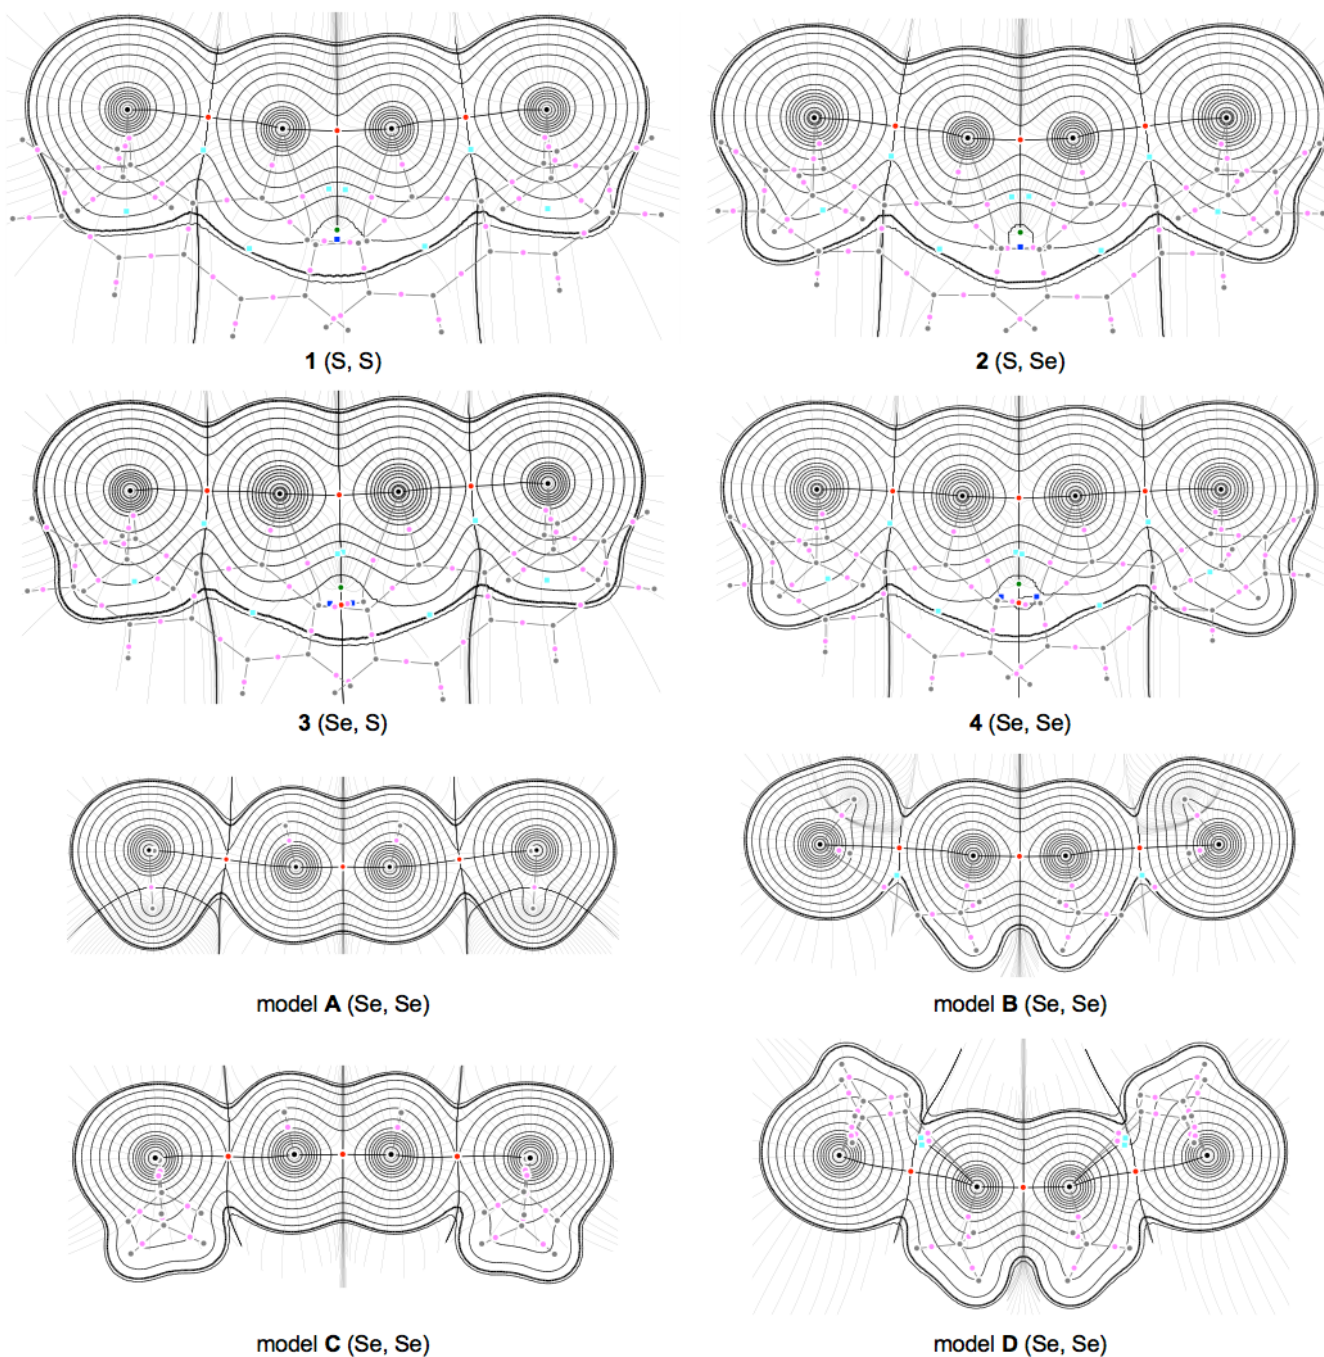

**Figure S9.** Trajectory plots for 1–4 and models A–D (Se, Se) drawn with MP2/6-311G(d), similarly to the case of Figure 4 in the text. Colors and marks are the same as those in Figure 4.

**Table S4.**  $r_{BP}$  and  $R_{SL}$  values for the  ${}^B E \cdots {}^A E \cdots {}^B E$  interactions in compounds **1–4** with MP2/BSS-A and models of **A–D** with MP2/BSS-C.<sup>[a]</sup>

| species<br>${}^B E \cdots {}^A E \cdots {}^B E$     | $R_{SL}({}^B E, {}^A E)$<br>(Å) | $R_{SL}({}^A E, {}^A E)$<br>(Å) | $r_{BP}({}^B E, {}^A E)$<br>(Å) | $r_{BP}({}^A E, {}^A E)$<br>(Å) | $\Delta r_{BP}({}^B E, {}^A E)^{[b]}$<br>(Å) | $\Delta r_{BP}({}^A E, {}^A E)^{[c]}$<br>(Å) |
|-----------------------------------------------------|---------------------------------|---------------------------------|---------------------------------|---------------------------------|----------------------------------------------|----------------------------------------------|
| <b>compounds 1–4</b>                                |                                 |                                 |                                 |                                 |                                              |                                              |
| ${}^B S \cdots {}^A S \cdots {}^B S$ in <b>1</b>    | 2.9418                          | 2.0559                          | 2.9577                          | 2.0576                          | 0.0159                                       | 0.0017                                       |
| ${}^B Se \cdots {}^A S \cdots {}^B Se$ in <b>2</b>  | 3.0255                          | 2.0603                          | 3.0396                          | 2.0621                          | 0.0141                                       | 0.0018                                       |
| ${}^B S \cdots {}^A Se \cdots {}^B S$ in <b>3</b>   | 2.9556                          | 2.3440                          | 2.9625                          | 2.3457                          | 0.0069                                       | 0.0017                                       |
| ${}^B Se \cdots {}^A Se \cdots {}^B Se$ in <b>4</b> | 3.0353                          | 2.3532                          | 3.0408                          | 2.3549                          | 0.0055                                       | 0.0017                                       |
| <b>model A</b>                                      |                                 |                                 |                                 |                                 |                                              |                                              |
| ${}^B S \cdots {}^A S \cdots {}^B S$                | 3.5251                          | 2.0590                          | 3.5357                          | 2.0607                          | 0.0106                                       | 0.0017                                       |
| ${}^B Se \cdots {}^A S \cdots {}^B Se$              | 3.6334                          | 2.0601                          | 3.6404                          | 2.0618                          | 0.0070                                       | 0.0017                                       |
| ${}^B S \cdots {}^A Se \cdots {}^B S$               | 3.5791                          | 2.3408                          | 3.5880                          | 2.3415                          | 0.0089                                       | 0.0007                                       |
| ${}^B Se \cdots {}^A Se \cdots {}^B Se$             | 3.6894                          | 2.3425                          | 3.6949                          | 2.3432                          | 0.0055                                       | 0.0007                                       |
| <b>model B</b>                                      |                                 |                                 |                                 |                                 |                                              |                                              |
| ${}^B S \cdots {}^A S \cdots {}^B S$                | 3.6907                          | 2.0332                          | 3.7386                          | 2.0342                          | 0.0479                                       | 0.0010                                       |
| ${}^B Se \cdots {}^A S \cdots {}^B Se$              | 3.7981                          | 2.0336                          | 3.8191                          | 2.0347                          | 0.0210                                       | 0.0011                                       |
| ${}^B S \cdots {}^A Se \cdots {}^B S$               | 3.7302                          | 2.3004                          | 3.7388                          | 2.3009                          | 0.0086                                       | 0.0005                                       |
| ${}^B Se \cdots {}^A Se \cdots {}^B Se$             | 3.8281                          | 2.3011                          | 3.8356                          | 2.3015                          | 0.0075                                       | 0.0004                                       |
| <b>model C</b>                                      |                                 |                                 |                                 |                                 |                                              |                                              |
| ${}^B S \cdots {}^A S \cdots {}^B S$                | 3.2537                          | 2.0695                          | 3.2705                          | 2.0712                          | 0.0168                                       | 0.0017                                       |
| ${}^B Se \cdots {}^A S \cdots {}^B Se$              | 3.3302                          | 2.0720                          | 3.3448                          | 2.0737                          | 0.0146                                       | 0.0017                                       |
| ${}^B S \cdots {}^A Se \cdots {}^B S$               | 3.2707                          | 2.3412                          | 3.2788                          | 2.3418                          | 0.0081                                       | 0.0006                                       |
| ${}^B Se \cdots {}^A Se \cdots {}^B Se$             | 3.3654                          | 2.3444                          | 3.3719                          | 2.3450                          | 0.0065                                       | 0.0006                                       |
| <b>model D</b>                                      |                                 |                                 |                                 |                                 |                                              |                                              |
| ${}^B S \cdots {}^A S \cdots {}^B S$                | 3.4434                          | 2.0407                          | 3.4649                          | 2.0418                          | 0.0215                                       | 0.0011                                       |
| ${}^B Se \cdots {}^A S \cdots {}^B Se$              | 3.5215                          | 2.0416                          | 3.5391                          | 2.0427                          | 0.0176                                       | 0.0011                                       |
| ${}^B S \cdots {}^A Se \cdots {}^B S$               | 3.4081                          | 2.3123                          | 3.4192                          | 2.3127                          | 0.0111                                       | 0.0004                                       |
| ${}^B Se \cdots {}^A Se \cdots {}^B Se$             | 3.5190                          | 2.3127                          | 3.5286                          | 2.3132                          | 0.0096                                       | 0.0005                                       |

[a] BSS-A: the 6-311+G(3df) basis sets being employed for S and Se with the 6-311G(d) basis sets for C and H. BSS-C: the 6-311+G(3df) basis sets being employed for S and Se with the 6-311G(d,p) basis sets for C and H. [b]  $\Delta r_{BP}({}^B E, {}^A E) = \Delta r_{BP}({}^B E, {}^A E) - R_{SL}({}^B E, {}^A E)$ . [c]  $\Delta r_{BP}({}^A E, {}^A E) = \Delta r_{BP}({}^A E, {}^A E) - R_{SL}({}^A E, {}^A E)$ .

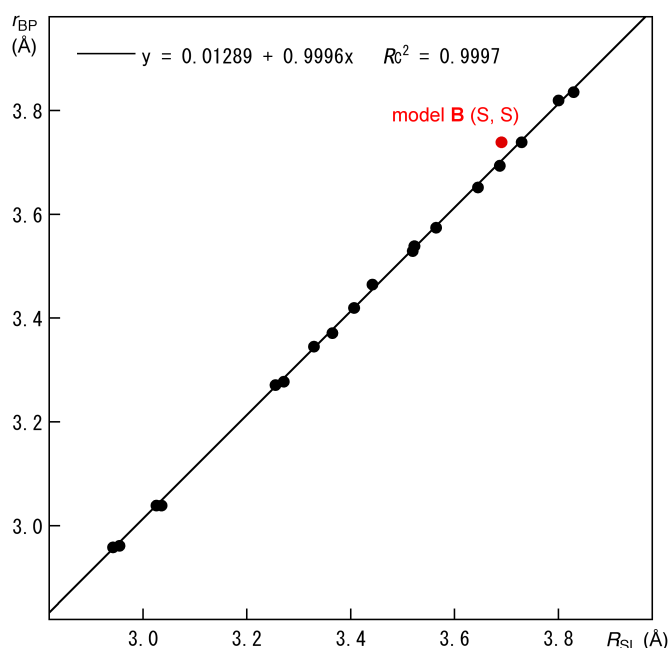

**Figure S10.** Plots of  $r_{BP}$  versus  $R_{SL}$  for the interactions in models **A–D**. Correlation is very good, which are shown in the figure.

**Table S5.** AIM functions and parameters evaluated for  ${}^A\text{E}-*{}^B\text{E}$  and  ${}^A\text{E}-*{}^B\text{E}$  at BCPs of models **A–D** with MP2/BSS-C.<sup>[a]</sup>

| Model<br>( <sup>A</sup> E, <sup>B</sup> E)                                                                                                   | Interaction<br>( <sup>A</sup> E-* <sup>B</sup> E) | $\rho_b(\mathbf{r}_c)$<br>(au) | $c\nabla^2\rho_b(\mathbf{r}_c)$ <sup>[b]</sup><br>(au) | $H_b(\mathbf{r}_c)$<br>(au) | $k_b(\mathbf{r}_c)$ <sup>[c]</sup> | $\nu(n)$ <sup>[d]</sup><br>(cm <sup>-1</sup> ) | $k_f$ <sup>[e]</sup><br>([f]) | $R$<br>(au) | $\theta$<br>(°) | $\theta_p$<br>(°) | $\kappa_p$<br>(au <sup>-1</sup> ) |
|----------------------------------------------------------------------------------------------------------------------------------------------|---------------------------------------------------|--------------------------------|--------------------------------------------------------|-----------------------------|------------------------------------|------------------------------------------------|-------------------------------|-------------|-----------------|-------------------|-----------------------------------|
| model <b>A</b> : H <sub>2</sub> <sup>B</sup> E--- <sup>A</sup> E(H)-(H) <sup>A</sup> E--- <sup>B</sup> EH <sub>2</sub> (C <sub>2</sub> )     |                                                   |                                |                                                        |                             |                                    |                                                |                               |             |                 |                   |                                   |
| (S, S)                                                                                                                                       | ( <sup>A</sup> S-* <sup>A</sup> S)                | 0.1480                         | -0.0178                                                | -0.0890                     | -2.6636                            | 527.5 (14)                                     | 4.3230                        | 0.0910      | 191.3           | 197.7             | 0.4                               |
| (S, Se)                                                                                                                                      | ( <sup>A</sup> S-* <sup>A</sup> Se)               | 0.1476                         | -0.0176                                                | -0.0886                     | -2.6568                            | 525.2 (14)                                     | 4.2905                        | 0.0906      | 191.2           | 197.7             | 0.4                               |
| (Se, S)                                                                                                                                      | ( <sup>A</sup> Se-* <sup>A</sup> S)               | 0.1044                         | -0.0068                                                | -0.0494                     | -2.3831                            | 296.6 (13)                                     | 3.3845                        | 0.0498      | 187.9           | 191.4             | 0.3                               |
| (Se, Se)                                                                                                                                     | ( <sup>A</sup> Se-* <sup>A</sup> Se)              | 0.1041                         | -0.0067                                                | -0.0491                     | -2.3783                            | 295.0 (13)                                     | 3.3969                        | 0.0496      | 187.8           | 191.4             | 0.2                               |
| (S, S)                                                                                                                                       | ( <sup>A</sup> S-* <sup>B</sup> S)                | 0.0081                         | 0.0031                                                 | 0.0009                      | -0.839                             | 75.4 (7)                                       | 0.032                         | 0.0032      | 74.5            | 92.7              | 163                               |
| (S, Se)                                                                                                                                      | ( <sup>A</sup> S-* <sup>B</sup> Se)               | 0.0077                         | 0.0028                                                 | 0.0008                      | -0.831                             | 61.2 (6)                                       | 0.016                         | 0.0029      | 73.9            | 87.8              | 134                               |
| (Se, S)                                                                                                                                      | ( <sup>A</sup> Se-* <sup>B</sup> S)               | 0.0085                         | 0.0030                                                 | 0.0009                      | -0.829                             | 59.6 (7)                                       | 0.062                         | 0.0031      | 73.7            | 91.2              | 238                               |
| (Se, Se)                                                                                                                                     | ( <sup>A</sup> Se-* <sup>B</sup> Se)              | 0.0082                         | 0.0027                                                 | 0.0008                      | -0.823                             | 45.5 (7)                                       | 0.053                         | 0.0028      | 73.2            | 86.9              | 214                               |
| model <b>B</b> : H <sub>2</sub> <sup>B</sup> E--- <sup>A</sup> E(Me)-(Me) <sup>A</sup> E--- <sup>B</sup> EH <sub>2</sub> (C <sub>2</sub> )   |                                                   |                                |                                                        |                             |                                    |                                                |                               |             |                 |                   |                                   |
| (S, S)                                                                                                                                       | ( <sup>A</sup> S-* <sup>A</sup> S)                | 0.1558                         | -0.0199                                                | -0.0986                     | -2.6752                            | 532.5 (18)                                     | 2.7540                        | 0.1006      | 191.4           | 197.6             | 0.3                               |
| (S, Se)                                                                                                                                      | ( <sup>A</sup> S-* <sup>A</sup> Se)               | 0.1557                         | -0.0197                                                | -0.0984                     | -2.6696                            | 531.7 (18)                                     | 2.7526                        | 0.1003      | 191.3           | 197.6             | 0.4                               |
| (Se, S)                                                                                                                                      | ( <sup>A</sup> Se-* <sup>A</sup> S)               | 0.1110                         | -0.0066                                                | -0.0546                     | -2.3203                            | 310.7 (18)                                     | 2.6416                        | 0.0550      | 186.9           | 190.1             | 0.2                               |
| (Se, Se)                                                                                                                                     | ( <sup>A</sup> Se-* <sup>A</sup> Se)              | 0.1108                         | -0.0066                                                | -0.0544                     | -2.3176                            | 310.1 (18)                                     | 2.7050                        | 0.0548      | 186.9           | 190.2             | 0.2                               |
| (S, S)                                                                                                                                       | ( <sup>A</sup> S-* <sup>B</sup> S)                | 0.0064                         | 0.0027                                                 | 0.0010                      | -0.766                             | 73.0 (8)                                       | 0.033                         | 0.0029      | 69.2            | 83.1              | 61.6                              |
| (S, Se)                                                                                                                                      | ( <sup>A</sup> S-* <sup>B</sup> Se)               | 0.0060                         | 0.0025                                                 | 0.0010                      | -0.754                             | 30.6 (3)                                       | 0.006                         | 0.0026      | 68.4            | 80.1              | 735                               |
| (Se, S)                                                                                                                                      | ( <sup>A</sup> Se-* <sup>B</sup> S)               | 0.0065                         | 0.0025                                                 | 0.0009                      | -0.777                             | 64.8 (6)                                       | 0.044                         | 0.0027      | 70.0            | 86.9              | 228                               |
| (Se, Se)                                                                                                                                     | ( <sup>A</sup> Se-* <sup>B</sup> Se)              | 0.0063                         | 0.0023                                                 | 0.0009                      | -0.770                             | 50.6 (6)                                       | 0.021                         | 0.0025      | 69.5            | 88.0              | 115                               |
| model <b>C</b> : Me <sub>2</sub> <sup>B</sup> E--- <sup>A</sup> E(H)-(H) <sup>A</sup> E--- <sup>B</sup> EMe <sub>2</sub> (C <sub>2</sub> )   |                                                   |                                |                                                        |                             |                                    |                                                |                               |             |                 |                   |                                   |
| (S, S)                                                                                                                                       | ( <sup>A</sup> S-* <sup>A</sup> S)                | 0.1455                         | -0.0166                                                | -0.0858                     | -2.6304                            | 509.0 (20)                                     | 3.5641                        | 0.0873      | 190.9           | 197.7             | 0.4                               |
| (S, Se)                                                                                                                                      | ( <sup>A</sup> S-* <sup>A</sup> Se)               | 0.1449                         | -0.0163                                                | -0.0850                     | -2.6201                            | 503.3 (20)                                     | 3.5247                        | 0.0865      | 190.8           | 197.7             | 0.4                               |
| (Se, S)                                                                                                                                      | ( <sup>A</sup> Se-* <sup>A</sup> S)               | 0.1038                         | -0.0057                                                | -0.0481                     | -2.3069                            | 288.5 (19)                                     | 2.8836                        | 0.0485      | 186.7           | 190.8             | 0.3                               |
| (Se, Se)                                                                                                                                     | ( <sup>A</sup> Se-* <sup>A</sup> Se)              | 0.1032                         | -0.0055                                                | -0.0476                     | -2.2976                            | 284.7 (19)                                     | 3.1112                        | 0.0479      | 186.5           | 190.9             | 0.3                               |
| (S, S)                                                                                                                                       | ( <sup>A</sup> S-* <sup>B</sup> S)                | 0.0145                         | 0.0047                                                 | 0.0003                      | -0.971                             | 90.5 (8)                                       | 0.042                         | 0.0047      | 86.7            | 114.5             | 148                               |
| (S, Se)                                                                                                                                      | ( <sup>A</sup> S-* <sup>B</sup> Se)               | 0.0144                         | 0.0044                                                 | 0.0003                      | -0.963                             | 76.0 (8)                                       | 0.037                         | 0.0044      | 86.0            | 113.8             | 207                               |
| (Se, S)                                                                                                                                      | ( <sup>A</sup> Se-* <sup>B</sup> S)               | 0.0161                         | 0.0048                                                 | 0.0001                      | -0.985                             | 70.9 (8)                                       | 0.038                         | 0.0048      | 88.3            | 121.8             | 175                               |
| (Se, Se)                                                                                                                                     | ( <sup>A</sup> Se-* <sup>B</sup> Se)              | 0.0155                         | 0.0043                                                 | 0.0002                      | -0.974                             | 55.5 (7)                                       | 0.049                         | 0.0043      | 87.1            | 121.2             | 311                               |
| model <b>D</b> : Me <sub>2</sub> <sup>B</sup> E--- <sup>A</sup> E(Me)-(Me) <sup>A</sup> E--- <sup>B</sup> EMe <sub>2</sub> (C <sub>2</sub> ) |                                                   |                                |                                                        |                             |                                    |                                                |                               |             |                 |                   |                                   |
| (S, S)                                                                                                                                       | ( <sup>A</sup> S-* <sup>B</sup> S)                | 0.1539                         | -0.0190                                                | -0.0959                     | -2.6534                            | 521.9 (24)                                     | 2.7080                        | 0.0978      | 191.2           | 197.6             | 0.4                               |
| (S, Se)                                                                                                                                      | ( <sup>A</sup> S-* <sup>B</sup> Se)               | 0.1536                         | -0.0188                                                | -0.0955                     | -2.6485                            | 519.8 (24)                                     | 2.6946                        | 0.0974      | 191.1           | 197.6             | 0.4                               |
| (Se, S)                                                                                                                                      | ( <sup>A</sup> Se-* <sup>B</sup> S)               | 0.1091                         | -0.0061                                                | -0.0527                     | -2.3036                            | 301.4 (24)                                     | 2.6443                        | 0.0531      | 186.6           | 190.3             | 0.2                               |
| (Se, Se)                                                                                                                                     | ( <sup>A</sup> Se-* <sup>B</sup> Se)              | 0.1089                         | -0.0060                                                | -0.0525                     | -2.2983                            | 300.7 (24)                                     | 2.6416                        | 0.0528      | 186.6           | 190.4             | 0.3                               |
| (S, S)                                                                                                                                       | ( <sup>A</sup> S-* <sup>B</sup> S)                | 0.0106                         | 0.0036                                                 | 0.0006                      | -0.909                             | 81.9 (10)                                      | 0.020                         | 0.0037      | 80.5            | 103.4             | 170                               |
| (S, Se)                                                                                                                                      | ( <sup>A</sup> S-* <sup>B</sup> Se)               | 0.0105                         | 0.0034                                                 | 0.0006                      | -0.906                             | 58.9 (7)                                       | 0.030                         | 0.0035      | 80.2            | 100.0             | 247                               |
| (Se, S)                                                                                                                                      | ( <sup>A</sup> Se-* <sup>B</sup> S)               | 0.0128                         | 0.0040                                                 | 0.0005                      | -0.935                             | 69.1 (8)                                       | 0.017                         | 0.0040      | 83.0            | 111.7             | 256                               |
| (Se, Se)                                                                                                                                     | ( <sup>A</sup> Se-* <sup>B</sup> Se)              | 0.0121                         | 0.0036                                                 | 0.0005                      | -0.925                             | 49.5 (7)                                       | 0.024                         | 0.0036      | 82.1            | 106.0             | 249                               |

[a] BSS-C: the 6-311+G(3df) basis sets being employed for S and Se with the 6-311G(d,p) basis sets for C and H. [b]  $c\nabla^2\rho_b(\mathbf{r}_c) = H_b(\mathbf{r}_c) - V_b(\mathbf{r}_c)/2$ , where  $c = \hbar^2/8m$ . [c]  $k_b(\mathbf{r}_c) = V_b(\mathbf{r}_c)/G_b(\mathbf{r}_c)$ . [d] Corresponding to the interaction in question. [e] Force constant for  $\nu$ . [f] mdyn Å<sup>-1</sup>.

**Table S6.** Classification and characterization of the chalcogen-chalcogen interactions in models **A–D** by  $\theta$ ,  $\theta_p$  and  $R$  values, evaluated with MP2/BSS-C.<sup>[a,b]</sup>

| models<br>( <sup>A</sup> E- <sup>B</sup> E) | $\theta$<br>(°) | $\theta_p$<br>(°) | $R$<br>(au) | classification<br>/character | models<br>( <sup>A</sup> E- <sup>B</sup> E) | $\theta$<br>(°) | $\theta_p$<br>(°) | $R$<br>(au) | classification<br>/character              |
|---------------------------------------------|-----------------|-------------------|-------------|------------------------------|---------------------------------------------|-----------------|-------------------|-------------|-------------------------------------------|
| A ( <sup>A</sup> S- <sup>B</sup> S)         | 74.5            | 92.7              | 0.0032      | <i>p</i> -CS/ <i>t</i> -HB   | A ( <sup>A</sup> S- <sup>B</sup> Se)        | 73.9            | 87.8              | 0.0029      | <i>p</i> -CS/vdW                          |
| A ( <sup>A</sup> Se- <sup>B</sup> S)        | 73.7            | 91.2              | 0.0031      | <i>p</i> -CS/ <i>t</i> -HB   | A ( <sup>A</sup> Se- <sup>B</sup> Se)       | 73.2            | 86.9              | 0.0028      | <i>p</i> -CS/vdW                          |
| B ( <sup>A</sup> S- <sup>B</sup> S)         | 69.2            | 83.1              | 0.0029      | <i>p</i> -CS/vdW             | B ( <sup>A</sup> S- <sup>B</sup> Se)        | 68.4            | 80.1              | 0.0026      | <i>p</i> -CS/vdW                          |
| B ( <sup>A</sup> Se- <sup>B</sup> S)        | 70.0            | 86.9              | 0.0027      | <i>p</i> -CS/vdW             | B ( <sup>A</sup> Se- <sup>B</sup> Se)       | 69.5            | 88.0              | 0.0025      | <i>p</i> -CS/vdW                          |
| C ( <sup>A</sup> S- <sup>B</sup> S)         | 86.7            | 114.5             | 0.0047      | <i>p</i> -CS/ <i>t</i> -HB   | C ( <sup>A</sup> S- <sup>B</sup> Se)        | 86.0            | 113.8             | 0.0044      | <i>p</i> -CS/ <i>t</i> -HB                |
| C ( <sup>A</sup> Se- <sup>B</sup> S)        | 88.3            | 121.8             | 0.0048      | <i>p</i> -CS/ <i>t</i> -HB   | C ( <sup>A</sup> Se- <sup>B</sup> Se)       | 87.1            | 121.2             | 0.0043      | <i>p</i> -CS/ <i>t</i> -HB <sup>[c]</sup> |
| D ( <sup>A</sup> S- <sup>B</sup> S)         | 80.5            | 103.4             | 0.0037      | <i>p</i> -CS/ <i>t</i> -HB   | D ( <sup>A</sup> S- <sup>B</sup> Se)        | 80.2            | 100.0             | 0.0035      | <i>p</i> -CS/ <i>t</i> -HB <sup>[c]</sup> |
| D ( <sup>A</sup> Se- <sup>B</sup> S)        | 83.0            | 111.7             | 0.0040      | <i>p</i> -CS/ <i>t</i> -HB   | D ( <sup>A</sup> Se- <sup>B</sup> Se)       | 82.1            | 106.0             | 0.0036      | <i>p</i> -CS/ <i>t</i> -HB <sup>[c]</sup> |

[a]  $0.045 \text{ au} < R < 0.090 \text{ au}$  for <sup>A</sup>E-<sup>A</sup>E and  $0.007 \text{ au} < R < 0.008 \text{ au}$  for <sup>A</sup>E-<sup>B</sup>E. The values are much less than 0.15 au for BSS-A; the 6-311+G(3df) basis set for O, S and Se with the 6-311+G(d,p) basis set for C and H. [b] Data are given at BCP of the interaction in question. [c] *Typical*-HB nature with covalency.

## References

- [S1] (a) *Atoms in Molecules. A Quantum Theory*: eds. R. F. W. Bader, Oxford University Press, Oxford, UK, 1990; (b) C. F. Matta, R. J. Boyd, *An Introduction to the Quantum Theory of Atoms in Molecules in The Quantum Theory of Atoms in Molecules: From Solid State to DNA and Drug Design*: eds. C. F. Matta, R. J. Boyd, WILEY-VCH, Weinheim, Germany, 2007, Chapter 1.
- [S2] (a) R. F. W. Bader, T. S. Slee, D. Cremer, E. Kraka, *J. Am. Chem. Soc.* **1983**, *105*, 5061–5068; (b) R. F. W. Bader, *Chem. Rev.* **1991**, *91*, 893–926; (c) R. F. W. Bader, *J. Phys. Chem. A* **1998**, *102*, 7314–7323; (d) F. Biegler-König, R. F. W. Bader, T. H. Tang, *J. Comput. Chem.* **1982**, *3*, 317–328; (e) R. F. W. Bader, *Acc. Chem. Res.* **1985**, *18*, 9–15; (f) T. H. Tang, R. F. W. Bader, P. MacDougall, *Inorg. Chem.* **1985**, *24*, 2047–2053; (g) F. Biegler-König, J. Schönbohm, D. Bayles, *J. Comput. Chem.* **2001**, *22*, 545–559; (h) F. Biegler-König, J. Schönbohm, *J. Comput. Chem.* **2002**, *23*, 1489–1494.
- [S3] W. Nakanishi, T. Nakamoto, S. Hayashi, T. Sasamori, N. Tokitoh, *Chem. Eur. J.* **2007**, *13*, 255–268.
- [S4] (a) W. Nakanishi, S. Hayashi, K. Narahara, *J. Phys. Chem. A* **2009**, *113*, 10050–10057; (b) W. Nakanishi, S. Hayashi, K. Narahara, *J. Phys. Chem. A* **2008**, *112*, 13593–13599.
- [S5] W. Nakanishi, S. Hayashi, *Curr. Org. Chem.* **2010**, *14*, 181–197.
- [S6] (a) W. Nakanishi, S. Hayashi, *J. Phys. Chem. A* **2010**, *114*, 7423–7430; (b) W. Nakanishi, S. Hayashi, K. Matsuiwa, M. Kitamoto, *Bull. Chem. Soc. Jpn* **2012**, *85*, 1293–1305.
- [S7] W. Grimme, J. Wortmann, D. Frowein, J. Lex, G. Chen, R. Gleiter, *J. Chem. Soc., Perkin Trans. 2* **1998**, 1893–1900.
- [S8] C.-T. Lin, N.-J. Wang, Y.-L. Yeh, T.-C. Chou, *Tetrahedron*, **1995**, *51*, 2907–2928.

## Optimized structures given by Cartesian coordinates

The structures were optimized employing the Gaussian 09 programs. Several types of basis sets were examined to search the suitable methods for the purpose. The Møller-Plesset second order energy correlation (MP2) level is applied to the calculations. The DFT level of M06-2X is also employed to examine the suitable methods.

|                      |                        |           |           |           |  |
|----------------------|------------------------|-----------|-----------|-----------|--|
| MP2/BSS-A            |                        |           |           |           |  |
| Compound             | <b>1</b>               |           |           |           |  |
| Symmetry             | $C_1$                  |           |           |           |  |
| energy               | MP2 = -2437.5263943 au |           |           |           |  |
| Standard orientation |                        |           |           |           |  |
| 6                    | 0                      | -4.127475 | -0.446699 | -0.562813 |  |
| 6                    | 0                      | -3.261563 | 0.446210  | 0.155653  |  |
| 6                    | 0                      | -3.894628 | 1.330759  | 1.112384  |  |
| 6                    | 0                      | -5.311114 | 1.426871  | 1.165641  |  |
| 6                    | 0                      | -6.112460 | 0.619079  | 0.385951  |  |
| 6                    | 0                      | -5.512524 | -0.324238 | -0.472418 |  |
| 6                    | 0                      | -1.823280 | 0.490105  | 0.064571  |  |
| 6                    | 0                      | -1.100721 | 1.295331  | 0.943123  |  |
| 6                    | 0                      | -1.738701 | 2.119346  | 1.891473  |  |
| 6                    | 0                      | -3.114891 | 2.172528  | 1.946843  |  |
| 1                    | 0                      | -5.754795 | 2.128941  | 1.869386  |  |
| 1                    | 0                      | -7.195462 | 0.703132  | 0.430296  |  |
| 1                    | 0                      | -6.127132 | -1.015142 | -1.044505 |  |
| 1                    | 0                      | -0.017575 | 1.314405  | 0.877338  |  |
| 1                    | 0                      | -1.133277 | 2.739876  | 2.548236  |  |
| 1                    | 0                      | -3.620936 | 2.829691  | 2.651281  |  |
| 16                   | 0                      | -3.529789 | -1.761690 | -1.587177 |  |
| 16                   | 0                      | -0.947338 | -0.399005 | -1.229531 |  |
| 6                    | 0                      | 4.127482  | 0.446680  | -0.562810 |  |
| 6                    | 0                      | 3.261557  | -0.446211 | 0.155663  |  |
| 6                    | 0                      | 3.894608  | -1.330768 | 1.112394  |  |
| 6                    | 0                      | 5.311093  | -1.426907 | 1.165646  |  |
| 6                    | 0                      | 6.112450  | -0.619132 | 0.385949  |  |
| 6                    | 0                      | 5.512529  | 0.324193  | -0.472420 |  |
| 6                    | 0                      | 1.823273  | -0.490080 | 0.064584  |  |
| 6                    | 0                      | 1.100701  | -1.295285 | 0.943144  |  |
| 6                    | 0                      | 1.738669  | -2.119308 | 1.891496  |  |
| 6                    | 0                      | 3.114858  | -2.172518 | 1.946861  |  |
| 1                    | 0                      | 5.754763  | -2.128982 | 1.869392  |  |
| 1                    | 0                      | 7.195451  | -0.703206 | 0.430291  |  |
| 1                    | 0                      | 6.127147  | 1.015085  | -1.044511 |  |
| 1                    | 0                      | 0.017554  | -1.314337 | 0.877366  |  |
| 1                    | 0                      | 1.133234  | -2.739821 | 2.548266  |  |
| 1                    | 0                      | 3.620892  | -2.829688 | 2.651299  |  |
| 16                   | 0                      | 3.529813  | 1.761682  | -1.587169 |  |
| 16                   | 0                      | 0.947344  | 0.399033  | -1.229525 |  |
| 6                    | 0                      | 3.030908  | 2.940211  | -0.306038 |  |
| 1                    | 0                      | 3.879919  | 3.176951  | 0.338013  |  |
| 1                    | 0                      | 2.702306  | 3.841524  | -0.829624 |  |
| 1                    | 0                      | 2.199389  | 2.543565  | 0.280301  |  |
| 6                    | 0                      | -3.030856 | -2.940213 | -0.306052 |  |
| 1                    | 0                      | -3.879857 | -3.176960 | 0.338009  |  |
| 1                    | 0                      | -2.702255 | -3.841524 | -0.829643 |  |
| 1                    | 0                      | -2.199332 | -2.543562 | 0.280275  |  |

|           |                        |
|-----------|------------------------|
| MP2/BSS-A |                        |
| Compound  | <b>2</b>               |
| Symmetry  | $C_2$                  |
| energy    | MP2 = -6442.3460668 au |

## Standard orientation

|    |   |           |           |           |
|----|---|-----------|-----------|-----------|
| 6  | 0 | 0.126941  | -4.164389 | -0.351975 |
| 6  | 0 | -0.697788 | -3.234203 | 0.364700  |
| 6  | 0 | -1.672051 | -3.804343 | 1.274606  |
| 6  | 0 | -1.914267 | -5.203915 | 1.275344  |
| 6  | 0 | -1.171891 | -6.057344 | 0.486266  |
| 6  | 0 | -0.137009 | -5.531687 | -0.314072 |
| 6  | 0 | -0.609363 | -1.795813 | 0.313016  |
| 6  | 0 | -1.348743 | -1.025454 | 1.209164  |
| 6  | 0 | -2.249348 | -1.607716 | 2.123131  |
| 6  | 0 | -2.443492 | -2.972184 | 2.126453  |
| 1  | 0 | -2.678935 | -5.595419 | 1.943949  |
| 1  | 0 | -1.366383 | -7.127033 | 0.489605  |
| 1  | 0 | 0.510712  | -6.201711 | -0.873748 |
| 1  | 0 | -1.263351 | 0.056006  | 1.177151  |
| 1  | 0 | -2.813365 | -0.965451 | 2.795691  |
| 1  | 0 | -3.166359 | -3.432628 | 2.797039  |
| 34 | 0 | 1.672051  | -3.661354 | -1.358040 |
| 16 | 0 | 0.349979  | -0.968885 | -0.962588 |
| 6  | 0 | -0.126941 | 4.164389  | -0.351975 |
| 6  | 0 | 0.697788  | 3.234203  | 0.364700  |
| 6  | 0 | 1.672051  | 3.804343  | 1.274606  |
| 6  | 0 | 1.914267  | 5.203915  | 1.275344  |
| 6  | 0 | 1.171891  | 6.057344  | 0.486266  |
| 6  | 0 | 0.137009  | 5.531687  | -0.314072 |
| 6  | 0 | 0.609363  | 1.795813  | 0.313016  |
| 6  | 0 | 1.348743  | 1.025454  | 1.209164  |
| 6  | 0 | 2.249348  | 1.607716  | 2.123131  |
| 6  | 0 | 2.443492  | 2.972184  | 2.126453  |
| 1  | 0 | 2.678935  | 5.595419  | 1.943949  |
| 1  | 0 | 1.366383  | 7.127033  | 0.489605  |
| 1  | 0 | -0.510712 | 6.201711  | -0.873748 |
| 1  | 0 | 1.263351  | -0.056006 | 1.177151  |
| 1  | 0 | 2.813365  | 0.965451  | 2.795691  |
| 1  | 0 | 3.166359  | 3.432628  | 2.797039  |
| 34 | 0 | -1.672051 | 3.661354  | -1.358040 |
| 16 | 0 | -0.349979 | 0.968885  | -0.962588 |
| 6  | 0 | -2.796800 | 3.185257  | 0.158275  |
| 1  | 0 | -2.811486 | 4.007468  | 0.874369  |
| 1  | 0 | -3.800724 | 3.018916  | -0.238574 |
| 1  | 0 | -2.429248 | 2.267462  | 0.619844  |
| 6  | 0 | 2.796800  | -3.185257 | 0.158275  |
| 1  | 0 | 2.811486  | -4.007468 | 0.874369  |
| 1  | 0 | 3.800724  | -3.018916 | -0.238574 |
| 1  | 0 | 2.429248  | -2.267462 | 0.619844  |

## MP2/BSS-A

Compound **3**  
Symmetry  $C_2$   
energy MP2 = -6442.365514 au

## Standard orientation

|   |   |           |           |           |
|---|---|-----------|-----------|-----------|
| 6 | 0 | 0.429659  | -4.291382 | -0.326390 |
| 6 | 0 | -0.429659 | -3.390705 | 0.386115  |
| 6 | 0 | -1.386456 | -3.985993 | 1.295875  |
| 6 | 0 | -1.480019 | -5.398974 | 1.409014  |
| 6 | 0 | -0.694050 | -6.232007 | 0.638948  |
| 6 | 0 | 0.289889  | -5.671331 | -0.200974 |
| 6 | 0 | -0.470152 | -1.962233 | 0.223861  |
| 6 | 0 | -1.246280 | -1.196267 | 1.090196  |
| 6 | 0 | -2.108660 | -1.792365 | 2.033644  |
| 6 | 0 | -2.183127 | -3.165369 | 2.135521  |
| 1 | 0 | -2.214554 | -5.814778 | 2.096590  |
| 1 | 0 | -0.786215 | -7.312116 | 0.721350  |

|    |   |           |           |           |
|----|---|-----------|-----------|-----------|
| 1  | 0 | 0.969056  | -6.312283 | -0.758020 |
| 1  | 0 | -1.257929 | -0.115078 | 0.986066  |
| 1  | 0 | -2.702065 | -1.156604 | 2.687175  |
| 1  | 0 | -2.879096 | -3.637147 | 2.826593  |
| 16 | 0 | 1.787137  | -3.718326 | -1.306263 |
| 34 | 0 | 0.501059  | -1.059483 | -1.196055 |
| 6  | 0 | -0.429659 | 4.291382  | -0.326390 |
| 6  | 0 | 0.429659  | 3.390705  | 0.386115  |
| 6  | 0 | 1.386456  | 3.985993  | 1.295875  |
| 6  | 0 | 1.480019  | 5.398974  | 1.409014  |
| 6  | 0 | 0.694050  | 6.232007  | 0.638948  |
| 6  | 0 | -0.289889 | 5.671331  | -0.200974 |
| 6  | 0 | 0.470152  | 1.962233  | 0.223861  |
| 6  | 0 | 1.246280  | 1.196267  | 1.090196  |
| 6  | 0 | 2.108660  | 1.792365  | 2.033644  |
| 6  | 0 | 2.183127  | 3.165369  | 2.135521  |
| 1  | 0 | 2.214554  | 5.814778  | 2.096590  |
| 1  | 0 | 0.786215  | 7.312116  | 0.721350  |
| 1  | 0 | -0.969056 | 6.312283  | -0.758020 |
| 1  | 0 | 1.257929  | 0.115078  | 0.986066  |
| 1  | 0 | 2.702065  | 1.156604  | 2.687175  |
| 1  | 0 | 2.879096  | 3.637147  | 2.826593  |
| 16 | 0 | -1.787137 | 3.718326  | -1.306263 |
| 34 | 0 | -0.501059 | 1.059483  | -1.196055 |
| 6  | 0 | -2.931228 | 3.247483  | 0.017527  |
| 1  | 0 | -3.157988 | 4.114562  | 0.640829  |
| 1  | 0 | -3.841730 | 2.893820  | -0.472754 |
| 1  | 0 | -2.507935 | 2.439476  | 0.618205  |
| 6  | 0 | 2.931228  | -3.247483 | 0.017527  |
| 1  | 0 | 3.157988  | -4.114562 | 0.640829  |
| 1  | 0 | 3.841730  | -2.893820 | -0.472754 |
| 1  | 0 | 2.507935  | -2.439476 | 0.618205  |

MP2/BSS-A

Compound

4

Symmetry

C<sub>2</sub>

energy

MP2 = -10447.1847475 au

Standard orientation

|    |   |           |           |           |
|----|---|-----------|-----------|-----------|
| 6  | 0 | -3.248055 | -2.869481 | -0.181003 |
| 6  | 0 | -3.020466 | -1.641928 | 0.522197  |
| 6  | 0 | -4.084632 | -1.189889 | 1.396779  |
| 6  | 0 | -5.306127 | -1.910984 | 1.468600  |
| 6  | 0 | -5.518374 | -3.036030 | 0.698463  |
| 6  | 0 | -4.465464 | -3.539424 | -0.093529 |
| 6  | 0 | -1.867653 | -0.790382 | 0.394176  |
| 6  | 0 | -1.705569 | 0.280462  | 1.270316  |
| 6  | 0 | -2.713680 | 0.647774  | 2.185563  |
| 6  | 0 | -3.889855 | -0.068871 | 2.244532  |
| 1  | 0 | -6.088528 | -1.537703 | 2.127147  |
| 1  | 0 | -6.462880 | -3.572136 | 0.749630  |
| 1  | 0 | -4.588377 | -4.474993 | -0.633501 |
| 1  | 0 | -0.821983 | 0.907468  | 1.193774  |
| 1  | 0 | -2.547906 | 1.494821  | 2.847741  |
| 1  | 0 | -4.696868 | 0.235418  | 2.908392  |
| 34 | 0 | -1.867653 | -3.771376 | -1.142979 |
| 34 | 0 | -0.546161 | -1.042148 | -1.008053 |
| 6  | 0 | 3.248055  | 2.869481  | -0.181003 |
| 6  | 0 | 3.020466  | 1.641928  | 0.522197  |
| 6  | 0 | 4.084632  | 1.189889  | 1.396779  |
| 6  | 0 | 5.306127  | 1.910984  | 1.468600  |
| 6  | 0 | 5.518374  | 3.036030  | 0.698463  |
| 6  | 0 | 4.465464  | 3.539424  | -0.093529 |
| 6  | 0 | 1.867653  | 0.790382  | 0.394176  |



|    |   |           |           |           |
|----|---|-----------|-----------|-----------|
| 6  | 0 | 1.705569  | -0.280462 | 1.270316  |
| 6  | 0 | 2.713680  | -0.647774 | 2.185563  |
| 6  | 0 | 3.889855  | 0.068871  | 2.244532  |
| 1  | 0 | 6.088528  | 1.537703  | 2.127147  |
| 1  | 0 | 6.462880  | 3.572136  | 0.749630  |
| 1  | 0 | 4.588377  | 4.474993  | -0.633501 |
| 1  | 0 | 0.821983  | -0.907468 | 1.193774  |
| 1  | 0 | 2.547906  | -1.494821 | 2.847741  |
| 1  | 0 | 4.696868  | -0.235418 | 2.908392  |
| 34 | 0 | 1.867653  | 3.771376  | -1.142979 |
| 34 | 0 | 0.546161  | 1.042148  | -1.008053 |
| 6  | 0 | 0.816166  | 4.291959  | 0.411441  |
| 1  | 0 | 1.447193  | 4.846122  | 1.107106  |
| 1  | 0 | 0.010275  | 4.931707  | 0.045080  |
| 1  | 0 | 0.394716  | 3.403547  | 0.884513  |
| 6  | 0 | -0.816166 | -4.291959 | 0.411441  |
| 1  | 0 | -1.447193 | -4.846122 | 1.107106  |
| 1  | 0 | -0.010275 | -4.931707 | 0.045080  |
| 1  | 0 | -0.394716 | -3.403547 | 0.884513  |

MP2/BSS-B

Compound

1

Symmetry

C<sub>1</sub>

energy

MP2 = -2437.411118 au

Standard orientation

|    |   |           |           |           |
|----|---|-----------|-----------|-----------|
| 6  | 0 | -4.142271 | -0.451780 | -0.566009 |
| 6  | 0 | -3.276362 | 0.441418  | 0.151545  |
| 6  | 0 | -3.911418 | 1.338755  | 1.094532  |
| 6  | 0 | -5.327558 | 1.444036  | 1.135962  |
| 6  | 0 | -6.127599 | 0.637149  | 0.354133  |
| 6  | 0 | -5.526676 | -0.318728 | -0.489370 |
| 6  | 0 | -1.837263 | 0.480192  | 0.065808  |
| 6  | 0 | -1.117464 | 1.282826  | 0.949173  |
| 6  | 0 | -1.757436 | 2.115444  | 1.888402  |
| 6  | 0 | -3.133484 | 2.177594  | 1.933463  |
| 1  | 0 | -5.772163 | 2.154366  | 1.830747  |
| 1  | 0 | -7.210340 | 0.728906  | 0.388400  |
| 1  | 0 | -6.141515 | -1.011088 | -1.059424 |
| 1  | 0 | -0.034103 | 1.299638  | 0.888693  |
| 1  | 0 | -1.153047 | 2.733060  | 2.548876  |
| 1  | 0 | -3.641142 | 2.843351  | 2.628562  |
| 16 | 0 | -3.541260 | -1.786889 | -1.565836 |
| 16 | 0 | -0.963292 | -0.410581 | -1.226929 |
| 6  | 0 | 4.142110  | 0.451435  | -0.567426 |
| 6  | 0 | 3.276410  | -0.441320 | 0.150932  |
| 6  | 0 | 3.911736  | -1.338035 | 1.094330  |
| 6  | 0 | 5.327889  | -1.443253 | 1.135457  |
| 6  | 0 | 6.127706  | -0.636850 | 0.352900  |
| 6  | 0 | 5.526538  | 0.318468  | -0.491063 |
| 6  | 0 | 1.837288  | -0.480181 | 0.065604  |
| 6  | 0 | 1.117744  | -1.282271 | 0.949669  |
| 6  | 0 | 1.757984  | -2.114272 | 1.889262  |
| 6  | 0 | 3.134046  | -2.176357 | 1.934001  |
| 1  | 0 | 5.772694  | -2.153126 | 1.830582  |
| 1  | 0 | 7.210458  | -0.728556 | 0.386943  |
| 1  | 0 | 6.141209  | 1.010472  | -1.061727 |
| 1  | 0 | 0.034367  | -1.299148 | 0.889484  |
| 1  | 0 | 1.153784  | -2.731483 | 2.550288  |
| 1  | 0 | 3.641903  | -2.841654 | 2.629394  |
| 16 | 0 | 3.540808  | 1.785877  | -1.567967 |
| 16 | 0 | 0.962952  | 0.409756  | -1.227462 |
| 6  | 0 | 3.053892  | 2.944447  | -0.261137 |
| 1  | 0 | 3.906686  | 3.165257  | 0.383215  |

|   |   |           |           |           |
|---|---|-----------|-----------|-----------|
| 1 | 0 | 2.727364  | 3.857287  | -0.765187 |
| 1 | 0 | 2.223426  | 2.542002  | 0.322371  |
| 6 | 0 | -3.054017 | -2.944608 | -0.258375 |
| 1 | 0 | -3.906646 | -3.164985 | 0.386346  |
| 1 | 0 | -2.727634 | -3.857782 | -0.761912 |
| 1 | 0 | -2.223394 | -2.541791 | 0.324653  |

MP2/BSS-B

Compound **2**  
Symmetry  $C_2$   
energy MP2 = -6442.2132526 au  
Standard orientation

|    |   |           |           |           |
|----|---|-----------|-----------|-----------|
| 6  | 0 | 0.119114  | -4.179909 | -0.361441 |
| 6  | 0 | -0.703344 | -3.248259 | 0.355270  |
| 6  | 0 | -1.690195 | -3.817386 | 1.251663  |
| 6  | 0 | -1.945716 | -5.214455 | 1.237520  |
| 6  | 0 | -1.206877 | -6.067283 | 0.444552  |
| 6  | 0 | -0.159021 | -5.544276 | -0.340341 |
| 6  | 0 | -0.603971 | -1.810024 | 0.312405  |
| 6  | 0 | -1.339831 | -1.042074 | 1.213660  |
| 6  | 0 | -2.249863 | -1.624069 | 2.118221  |
| 6  | 0 | -2.457030 | -2.986470 | 2.108732  |
| 1  | 0 | -2.718990 | -5.604626 | 1.896921  |
| 1  | 0 | -1.412161 | -7.134924 | 0.435649  |
| 1  | 0 | 0.488140  | -6.215502 | -0.899194 |
| 1  | 0 | -1.249088 | 0.039009  | 1.188733  |
| 1  | 0 | -2.809909 | -0.982661 | 2.794929  |
| 1  | 0 | -3.189154 | -3.446131 | 2.769706  |
| 34 | 0 | 1.690195  | -3.681039 | -1.338946 |
| 16 | 0 | 0.359844  | -0.985901 | -0.960503 |
| 6  | 0 | -0.119114 | 4.179909  | -0.361441 |
| 6  | 0 | 0.703344  | 3.248259  | 0.355270  |
| 6  | 0 | 1.690195  | 3.817386  | 1.251663  |
| 6  | 0 | 1.945716  | 5.214455  | 1.237520  |
| 6  | 0 | 1.206877  | 6.067283  | 0.444552  |
| 6  | 0 | 0.159021  | 5.544276  | -0.340341 |
| 6  | 0 | 0.603971  | 1.810024  | 0.312405  |
| 6  | 0 | 1.339831  | 1.042074  | 1.213660  |
| 6  | 0 | 2.249863  | 1.624069  | 2.118221  |
| 6  | 0 | 2.457030  | 2.986470  | 2.108732  |
| 1  | 0 | 2.718990  | 5.604626  | 1.896921  |
| 1  | 0 | 1.412161  | 7.134924  | 0.435649  |
| 1  | 0 | -0.488140 | 6.215502  | -0.899194 |
| 1  | 0 | 1.249088  | -0.039009 | 1.188733  |
| 1  | 0 | 2.809909  | 0.982661  | 2.794929  |
| 1  | 0 | 3.189154  | 3.446131  | 2.769706  |
| 34 | 0 | -1.690195 | 3.681039  | -1.338946 |
| 16 | 0 | -0.359844 | 0.985901  | -0.960503 |
| 6  | 0 | -2.791932 | 3.226800  | 0.207275  |
| 1  | 0 | -2.783431 | 4.052873  | 0.918640  |
| 1  | 0 | -3.805880 | 3.068997  | -0.166307 |
| 1  | 0 | -2.425811 | 2.308236  | 0.668059  |
| 6  | 0 | 2.791932  | -3.226800 | 0.207275  |
| 1  | 0 | 2.783431  | -4.052873 | 0.918640  |
| 1  | 0 | 3.805880  | -3.068997 | -0.166307 |
| 1  | 0 | 2.425811  | -2.308236 | 0.668059  |

MP2/BSS-B

Compound **3**  
Symmetry  $C_2$   
energy MP2 = -6442.2348538 au

## Standard orientation

|    |   |           |           |           |
|----|---|-----------|-----------|-----------|
| 6  | 0 | 0.429345  | -4.312938 | -0.331104 |
| 6  | 0 | -0.429345 | -3.410838 | 0.380322  |
| 6  | 0 | -1.391588 | -4.005540 | 1.284614  |
| 6  | 0 | -1.499670 | -5.418481 | 1.383830  |
| 6  | 0 | -0.717254 | -6.251653 | 0.610591  |
| 6  | 0 | 0.275550  | -5.692131 | -0.219470 |
| 6  | 0 | -0.457904 | -1.980561 | 0.229966  |
| 6  | 0 | -1.232402 | -1.216536 | 1.099317  |
| 6  | 0 | -2.100550 | -1.813028 | 2.036905  |
| 6  | 0 | -2.185793 | -3.186046 | 2.127628  |
| 1  | 0 | -2.239734 | -5.833396 | 2.065953  |
| 1  | 0 | -0.820340 | -7.331566 | 0.681828  |
| 1  | 0 | 0.953285  | -6.334687 | -0.776397 |
| 1  | 0 | -1.238809 | -0.134835 | 1.001506  |
| 1  | 0 | -2.691624 | -1.177740 | 2.692989  |
| 1  | 0 | -2.887302 | -3.658478 | 2.812581  |
| 16 | 0 | 1.802410  | -3.742138 | -1.294858 |
| 34 | 0 | 0.512415  | -1.070916 | -1.192868 |
| 6  | 0 | -0.429345 | 4.312938  | -0.331104 |
| 6  | 0 | 0.429345  | 3.410838  | 0.380322  |
| 6  | 0 | 1.391588  | 4.005540  | 1.284614  |
| 6  | 0 | 1.499670  | 5.418481  | 1.383830  |
| 6  | 0 | 0.717254  | 6.251653  | 0.610591  |
| 6  | 0 | -0.275550 | 5.692131  | -0.219470 |
| 6  | 0 | 0.457904  | 1.980561  | 0.229966  |
| 6  | 0 | 1.232402  | 1.216536  | 1.099317  |
| 6  | 0 | 2.100550  | 1.813028  | 2.036905  |
| 6  | 0 | 2.185793  | 3.186046  | 2.127628  |
| 1  | 0 | 2.239734  | 5.833396  | 2.065953  |
| 1  | 0 | 0.820340  | 7.331566  | 0.681828  |
| 1  | 0 | -0.953285 | 6.334687  | -0.776397 |
| 1  | 0 | 1.238809  | 0.134835  | 1.001506  |
| 1  | 0 | 2.691624  | 1.177740  | 2.692989  |
| 1  | 0 | 2.887302  | 3.658478  | 2.812581  |
| 16 | 0 | -1.802410 | 3.742138  | -1.294858 |
| 34 | 0 | -0.512415 | 1.070916  | -1.192868 |
| 6  | 0 | -2.932074 | 3.282024  | 0.048277  |
| 1  | 0 | -3.146839 | 4.152265  | 0.671052  |
| 1  | 0 | -3.851041 | 2.930253  | -0.426803 |
| 1  | 0 | -2.505312 | 2.474960  | 0.647267  |
| 6  | 0 | 2.932074  | -3.282024 | 0.048277  |
| 1  | 0 | 3.146839  | -4.152265 | 0.671052  |
| 1  | 0 | 3.851041  | -2.930253 | -0.426803 |
| 1  | 0 | 2.505312  | -2.474960 | 0.647267  |

## MP2/BSS-B

Compound **4**  
Symmetry  $C_2$   
energy MP2 = -10447.0363764 au

## Standard orientation

|   |   |           |           |           |
|---|---|-----------|-----------|-----------|
| 6 | 0 | -3.257675 | -2.890539 | -0.181318 |
| 6 | 0 | -3.029032 | -1.661182 | 0.518673  |
| 6 | 0 | -4.093758 | -1.207095 | 1.391672  |
| 6 | 0 | -5.318522 | -1.922976 | 1.459127  |
| 6 | 0 | -5.532306 | -3.047509 | 0.689016  |
| 6 | 0 | -4.477718 | -3.555427 | -0.097573 |
| 6 | 0 | -1.873375 | -0.812346 | 0.394746  |
| 6 | 0 | -1.713494 | 0.259234  | 1.270187  |
| 6 | 0 | -2.722251 | 0.628187  | 2.183672  |
| 6 | 0 | -3.899887 | -0.085949 | 2.239401  |
| 1 | 0 | -6.101250 | -1.546550 | 2.115457  |
| 1 | 0 | -6.479137 | -3.579833 | 0.736459  |

|    |   |           |           |           |
|----|---|-----------|-----------|-----------|
| 1  | 0 | -4.601694 | -4.491534 | -0.636316 |
| 1  | 0 | -0.830360 | 0.886646  | 1.193670  |
| 1  | 0 | -2.556649 | 1.475614  | 2.845388  |
| 1  | 0 | -4.708517 | 0.219679  | 2.900631  |
| 34 | 0 | -1.873375 | -3.807143 | -1.135219 |
| 34 | 0 | -0.549343 | -1.057799 | -1.013506 |
| 6  | 0 | 3.257675  | 2.890539  | -0.181318 |
| 6  | 0 | 3.029032  | 1.661182  | 0.518673  |
| 6  | 0 | 4.093758  | 1.207095  | 1.391672  |
| 6  | 0 | 5.318522  | 1.922976  | 1.459127  |
| 6  | 0 | 5.532306  | 3.047509  | 0.689016  |
| 6  | 0 | 4.477718  | 3.555427  | -0.097573 |
| 6  | 0 | 1.873375  | 0.812346  | 0.394746  |
| 6  | 0 | 1.713494  | -0.259234 | 1.270187  |
| 6  | 0 | 2.722251  | -0.628187 | 2.183672  |
| 6  | 0 | 3.899887  | 0.085949  | 2.239401  |
| 1  | 0 | 6.101250  | 1.546550  | 2.115457  |
| 1  | 0 | 6.479137  | 3.579833  | 0.736459  |
| 1  | 0 | 4.601694  | 4.491534  | -0.636316 |
| 1  | 0 | 0.830360  | -0.886646 | 1.193670  |
| 1  | 0 | 2.556649  | -1.475614 | 2.845388  |
| 1  | 0 | 4.708517  | -0.219679 | 2.900631  |
| 34 | 0 | 1.873375  | 3.807143  | -1.135219 |
| 34 | 0 | 0.549343  | 1.057799  | -1.013506 |
| 6  | 0 | 0.826052  | 4.317365  | 0.431718  |
| 1  | 0 | 1.461721  | 4.857334  | 1.133923  |
| 1  | 0 | 0.024594  | 4.968619  | 0.076727  |
| 1  | 0 | 0.397695  | 3.427319  | 0.894762  |
| 6  | 0 | -0.826052 | -4.317365 | 0.431718  |
| 1  | 0 | -1.461721 | -4.857334 | 1.133923  |
| 1  | 0 | -0.024594 | -4.968619 | 0.076727  |
| 1  | 0 | -0.397695 | -3.427319 | 0.894762  |

MP2/BSS-C

Compound Model A (S, S)  
Symmetry  $C_2$   
energy MP2 = -1594.3864296 au  
Standard orientation

|    |   |           |           |           |
|----|---|-----------|-----------|-----------|
| 16 | 0 | -0.182058 | 4.515400  | -0.205900 |
| 1  | 0 | -1.468017 | 4.148897  | -0.199415 |
| 1  | 0 | -0.047725 | 4.277458  | 1.103112  |
| 16 | 0 | -0.182058 | 1.013261  | 0.195466  |
| 1  | 0 | 0.706861  | 1.383101  | -0.736758 |
| 16 | 0 | 0.182058  | -1.013261 | 0.195466  |
| 1  | 0 | -0.706861 | -1.383101 | -0.736758 |
| 16 | 0 | 0.182058  | -4.515400 | -0.205900 |
| 1  | 0 | 1.468017  | -4.148897 | -0.199415 |
| 1  | 0 | 0.047725  | -4.277458 | 1.103112  |

MP2/BSS-C

Compound Model A (S, Se)  
Symmetry  $C_2$   
energy MP2 = -5598.867083 au  
Standard orientation

|    |   |           |           |           |
|----|---|-----------|-----------|-----------|
| 34 | 0 | -0.181650 | 4.622826  | -0.144853 |
| 1  | 0 | -1.588748 | 4.221117  | -0.128045 |
| 1  | 0 | -0.050681 | 4.363083  | 1.289371  |
| 16 | 0 | -0.181650 | 1.013911  | 0.276232  |
| 1  | 0 | 0.708042  | 1.382131  | -0.656020 |
| 16 | 0 | 0.181650  | -1.013911 | 0.276232  |
| 1  | 0 | -0.708042 | -1.382131 | -0.656020 |
| 34 | 0 | -0.181650 | -4.622826 | -0.144853 |
| 1  | 0 | 1.588748  | -4.221117 | -0.128045 |

|   |   |          |           |          |
|---|---|----------|-----------|----------|
| 1 | 0 | 0.050681 | -4.363083 | 1.289371 |
|---|---|----------|-----------|----------|

MP2/BSS-C

Compound Model A (Se, S)

Symmetry C<sub>2</sub>

energy MP2 = -5598.8873202 au

Standard orientation

|    |   |           |           |           |
|----|---|-----------|-----------|-----------|
| 16 | 0 | -0.178113 | 4.713482  | -0.269990 |
| 1  | 0 | -1.497904 | 4.497647  | -0.263533 |
| 1  | 0 | -0.099774 | 4.642358  | 1.063186  |
| 34 | 0 | -0.178113 | 1.156788  | 0.129932  |
| 1  | 0 | 0.816430  | 1.483883  | -0.897504 |
| 34 | 0 | 0.178113  | -1.156788 | 0.129932  |
| 1  | 0 | -0.816430 | -1.483883 | -0.897504 |
| 16 | 0 | 0.178113  | -4.713482 | -0.269990 |
| 1  | 0 | 1.497904  | -4.497647 | -0.263533 |
| 1  | 0 | 0.099774  | -4.642358 | 1.063186  |

MP2/BSS-C

Compound Model A (Se, Se)

Symmetry C<sub>2</sub>

energy MP2 = -9603.3680377 au

Standard orientation

|    |   |           |           |           |
|----|---|-----------|-----------|-----------|
| 34 | 0 | -0.182597 | 4.822859  | -0.211016 |
| 1  | 0 | -1.626869 | 4.587078  | -0.191482 |
| 1  | 0 | -0.108816 | 4.736923  | 1.248127  |
| 34 | 0 | -0.182597 | 1.156943  | 0.204148  |
| 1  | 0 | 0.811632  | 1.485903  | -0.823132 |
| 34 | 0 | 0.182597  | -1.156943 | 0.204148  |
| 1  | 0 | -0.811632 | -1.485903 | -0.823132 |
| 34 | 0 | 0.182597  | -4.822859 | -0.211016 |
| 1  | 0 | 1.626869  | -4.587078 | -0.191482 |
| 1  | 0 | 0.108816  | -4.736923 | 1.248127  |

MP2/BSS-C

Compound Model B (S, S)

Symmetry C<sub>2</sub>

energy MP2 = -1672.7825301 au

Standard orientation

|    |   |           |           |           |
|----|---|-----------|-----------|-----------|
| 16 | 0 | 0.033052  | 4.665330  | -0.594195 |
| 1  | 0 | 1.102213  | 3.916868  | -0.301069 |
| 1  | 0 | -0.384677 | 3.792796  | -1.518075 |
| 16 | 0 | -0.033052 | 1.016046  | -0.046834 |
| 6  | 0 | -1.236521 | 1.378588  | 1.259139  |
| 1  | 0 | -1.345657 | 2.467242  | 1.267210  |
| 1  | 0 | -0.865966 | 1.038081  | 2.228135  |
| 1  | 0 | -2.191585 | 0.904919  | 1.025423  |
| 16 | 0 | 0.033052  | -1.016046 | -0.046834 |
| 6  | 0 | 1.236521  | -1.378588 | 1.259139  |
| 1  | 0 | 1.345657  | -2.467242 | 1.267210  |
| 1  | 0 | 0.865966  | -1.038081 | 2.228135  |
| 1  | 0 | 2.191585  | -0.904919 | 1.025423  |
| 16 | 0 | -0.033052 | -4.665330 | -0.594195 |
| 1  | 0 | -1.102213 | -3.916868 | -0.301069 |
| 1  | 0 | 0.384677  | -3.792796 | -1.518075 |

MP2/BSS-C

Compound Model B (S, Se)

Symmetry C<sub>2</sub>

energy MP2 = -5677.5934432 au

Standard orientation

|    |   |           |          |           |
|----|---|-----------|----------|-----------|
| 34 | 0 | -1.639103 | 4.476296 | -0.439268 |
| 1  | 0 | -0.269776 | 4.116144 | -0.091607 |

|    |   |           |           |           |
|----|---|-----------|-----------|-----------|
| 1  | 0 | -1.713461 | 3.380979  | -1.398721 |
| 16 | 0 | -0.384516 | 0.941301  | 0.157116  |
| 6  | 0 | -1.639103 | 0.861442  | 1.463103  |
| 1  | 0 | -2.121271 | 1.843712  | 1.471331  |
| 1  | 0 | -1.173262 | 0.671626  | 2.432260  |
| 1  | 0 | -2.369160 | 0.084525  | 1.229363  |
| 16 | 0 | 0.384516  | -0.941301 | 0.157116  |
| 6  | 0 | 1.639103  | -0.861442 | 1.463103  |
| 1  | 0 | 2.121271  | -1.843712 | 1.471331  |
| 1  | 0 | 1.173262  | -0.671626 | 2.432260  |
| 1  | 0 | 2.369160  | -0.084525 | 1.229363  |
| 34 | 0 | 1.639103  | -4.476296 | -0.439268 |
| 1  | 0 | 0.269776  | -4.116144 | -0.091607 |
| 1  | 0 | 1.713461  | -3.380979 | -1.398721 |

MP2/BSS-C

Compound Model B (Se, S)  
Symmetry C<sub>2</sub>  
energy MP2 = -5677.6170425 au  
Standard orientation

|    |   |           |           |           |
|----|---|-----------|-----------|-----------|
| 16 | 0 | 0.006526  | 4.871876  | -0.383168 |
| 1  | 0 | 1.162178  | 4.221800  | -0.205497 |
| 1  | 0 | -0.306535 | 4.132058  | -1.453042 |
| 34 | 0 | -0.006526 | 1.150201  | -0.131536 |
| 6  | 0 | -1.311374 | 1.473206  | 1.280728  |
| 1  | 0 | -1.420013 | 2.559149  | 1.342596  |
| 1  | 0 | -0.938873 | 1.076158  | 2.225612  |
| 1  | 0 | -2.258298 | 1.006515  | 1.008879  |
| 34 | 0 | 0.006526  | -1.150201 | -0.131536 |
| 6  | 0 | 1.311374  | -1.473206 | 1.280728  |
| 1  | 0 | 1.420013  | -2.559149 | 1.342596  |
| 1  | 0 | 0.938873  | -1.076158 | 2.225612  |
| 1  | 0 | 2.258298  | -1.006515 | 1.008879  |
| 16 | 0 | -0.006526 | -4.871876 | -0.383168 |
| 1  | 0 | -1.162178 | -4.221800 | -0.205497 |
| 1  | 0 | 0.306535  | -4.132058 | -1.453042 |

MP2/BSS-C

Compound Model B (Se, Se)  
Symmetry C<sub>2</sub>  
energy MP2 = -9682.4281348 au  
Standard orientation

|    |   |           |           |           |
|----|---|-----------|-----------|-----------|
| 34 | 0 | 0.009020  | 4.968138  | -0.312082 |
| 1  | 0 | 1.238022  | 4.215643  | -0.089448 |
| 1  | 0 | -0.349244 | 4.112067  | -1.436923 |
| 34 | 0 | -0.009020 | 1.150500  | -0.030465 |
| 6  | 0 | -1.315106 | 1.469237  | 1.381989  |
| 1  | 0 | -1.427252 | 2.554902  | 1.444264  |
| 1  | 0 | -0.941505 | 1.073163  | 2.326892  |
| 1  | 0 | -2.260626 | 0.999768  | 1.109897  |
| 34 | 0 | 0.009020  | -1.150500 | -0.030465 |
| 6  | 0 | 1.315106  | -1.469237 | 1.381989  |
| 1  | 0 | 1.427252  | -2.554902 | 1.444264  |
| 1  | 0 | 0.941505  | -1.073163 | 2.326892  |
| 1  | 0 | 2.260626  | -0.999768 | 1.109897  |
| 34 | 0 | -0.009020 | -4.968138 | -0.312082 |
| 1  | 0 | -1.238022 | -4.215643 | -0.089448 |
| 1  | 0 | 0.349244  | -4.112067 | -1.436923 |

MP2/BSS-C

Compound Model C (S, S)  
Symmetry C<sub>2</sub>  
energy MP2 = -1751.1629564 au

## Standard orientation

|    |   |           |           |           |
|----|---|-----------|-----------|-----------|
| 16 | 0 | 0.068525  | 4.283003  | -0.366693 |
| 6  | 0 | -1.713850 | 4.216418  | -0.108397 |
| 1  | 0 | -2.183028 | 4.231555  | -1.094789 |
| 1  | 0 | -1.989082 | 3.290847  | 0.405005  |
| 1  | 0 | -2.050458 | 5.083558  | 0.466593  |
| 6  | 0 | 0.599512  | 4.210148  | 1.354313  |
| 1  | 0 | 1.691480  | 4.242634  | 1.356065  |
| 1  | 0 | 0.211717  | 5.067542  | 1.911405  |
| 1  | 0 | 0.267343  | 3.275344  | 1.814360  |
| 16 | 0 | -0.068525 | 1.032498  | -0.325574 |
| 1  | 0 | 0.855657  | 1.297836  | -1.257850 |
| 16 | 0 | 0.068525  | -1.032498 | -0.325574 |
| 1  | 0 | -0.855657 | -1.297836 | -1.257850 |
| 16 | 0 | -0.068525 | -4.283003 | -0.366693 |
| 6  | 0 | 1.713850  | -4.216418 | -0.108397 |
| 1  | 0 | 2.183028  | -4.231555 | -1.094789 |
| 1  | 0 | 1.989082  | -3.290847 | 0.405005  |
| 1  | 0 | 2.050458  | -5.083558 | 0.466593  |
| 6  | 0 | -0.599512 | -4.210148 | 1.354313  |
| 1  | 0 | -1.691480 | -4.242634 | 1.356065  |
| 1  | 0 | -0.211717 | -5.067542 | 1.911405  |
| 1  | 0 | -0.267343 | -3.275344 | 1.814360  |

## MP2/BSS-C

Compound Model C (S, Se)  
 Symmetry  $C_2$   
 energy MP2 = -5755.9852957 au

## Standard orientation

|    |   |           |           |           |
|----|---|-----------|-----------|-----------|
| 34 | 0 | 0.045975  | 4.362268  | -0.265867 |
| 6  | 0 | -1.883660 | 4.198464  | -0.354575 |
| 1  | 0 | -2.162261 | 4.252724  | -1.408766 |
| 1  | 0 | -2.187155 | 3.233051  | 0.055410  |
| 1  | 0 | -2.351755 | 5.018650  | 0.193152  |
| 6  | 0 | 0.183513  | 4.201277  | 1.661149  |
| 1  | 0 | 1.244141  | 4.259890  | 1.913132  |
| 1  | 0 | -0.355443 | 5.020114  | 2.141633  |
| 1  | 0 | -0.214814 | 3.234662  | 1.976065  |
| 16 | 0 | -0.045975 | 1.034960  | -0.161053 |
| 1  | 0 | 0.883346  | 1.279754  | -1.093760 |
| 16 | 0 | 0.045975  | -1.034960 | -0.161053 |
| 1  | 0 | -0.883346 | -1.279754 | -1.093760 |
| 34 | 0 | -0.045975 | -4.362268 | -0.265867 |
| 6  | 0 | 1.883660  | -4.198464 | -0.354575 |
| 1  | 0 | 2.162261  | -4.252724 | -1.408766 |
| 1  | 0 | 2.187155  | -3.233051 | 0.055410  |
| 1  | 0 | 2.351755  | -5.018650 | 0.193152  |
| 6  | 0 | -0.183513 | -4.201277 | 1.661149  |
| 1  | 0 | -1.244141 | -4.259890 | 1.913132  |
| 1  | 0 | 0.355443  | -5.020114 | 2.141633  |
| 1  | 0 | 0.214814  | -3.234662 | 1.976065  |

## MP2/BSS-C

Compound Model C (Se, S)  
 Symmetry  $C_2$   
 energy MP2 = -5755.9953278 au

## Standard orientation

|    |   |           |          |           |
|----|---|-----------|----------|-----------|
| 16 | 0 | 0.065085  | 4.435988 | -0.292079 |
| 6  | 0 | -1.727373 | 4.444886 | -0.103780 |
| 1  | 0 | -2.156787 | 4.420840 | -1.107888 |
| 1  | 0 | -2.056586 | 3.559461 | 0.447890  |
| 1  | 0 | -2.053690 | 5.353663 | 0.409386  |
| 6  | 0 | 0.526849  | 4.445599 | 1.450379  |

|    |   |           |           |           |
|----|---|-----------|-----------|-----------|
| 1  | 0 | 1.618291  | 4.432289  | 1.494093  |
| 1  | 0 | 0.155483  | 5.350291  | 1.939641  |
| 1  | 0 | 0.137317  | 3.554704  | 1.951214  |
| 34 | 0 | -0.065085 | 1.168794  | -0.214822 |
| 1  | 0 | 0.953300  | 1.393605  | -1.236719 |
| 34 | 0 | 0.065085  | -1.168794 | -0.214822 |
| 1  | 0 | -0.953300 | -1.393605 | -1.236719 |
| 16 | 0 | -0.065085 | -4.435988 | -0.292079 |
| 6  | 0 | 1.727373  | -4.444886 | -0.103780 |
| 1  | 0 | 2.156787  | -4.420840 | -1.107888 |
| 1  | 0 | 2.056586  | -3.559461 | 0.447890  |
| 1  | 0 | 2.053690  | -5.353663 | 0.409386  |
| 6  | 0 | -0.526849 | -4.445599 | 1.450379  |
| 1  | 0 | -1.618291 | -4.432289 | 1.494093  |
| 1  | 0 | -0.155483 | -5.350291 | 1.939641  |
| 1  | 0 | -0.137317 | -3.554704 | 1.951214  |

MP2/BSS-C

Compound Model C (Se, Se)  
Symmetry C<sub>2</sub>  
energy MP2 = -9760.8173984 au  
Standard orientation

|    |   |           |           |           |
|----|---|-----------|-----------|-----------|
| 34 | 0 | 0.095084  | 4.527300  | -0.223212 |
| 6  | 0 | -1.650779 | 4.367457  | 0.604231  |
| 1  | 0 | -2.392255 | 4.424428  | -0.194976 |
| 1  | 0 | -1.729597 | 3.402197  | 1.109425  |
| 1  | 0 | -1.803663 | 5.186119  | 1.310110  |
| 6  | 0 | 1.120007  | 4.323935  | 1.410399  |
| 1  | 0 | 2.175246  | 4.385461  | 1.137071  |
| 1  | 0 | 0.872707  | 5.127976  | 2.106348  |
| 1  | 0 | 0.910989  | 3.347040  | 1.851217  |
| 34 | 0 | -0.095084 | 1.168347  | -0.308439 |
| 1  | 0 | 0.917470  | 1.416624  | -1.330830 |
| 34 | 0 | 0.095084  | -1.168347 | -0.308439 |
| 1  | 0 | -0.917470 | -1.416624 | -1.330830 |
| 34 | 0 | -0.095084 | -4.527300 | -0.223212 |
| 6  | 0 | 1.650779  | -4.367457 | 0.604231  |
| 1  | 0 | 2.392255  | -4.424428 | -0.194976 |
| 1  | 0 | 1.729597  | -3.402197 | 1.109425  |
| 1  | 0 | 1.803663  | -5.186119 | 1.310110  |
| 6  | 0 | -1.120007 | -4.323935 | 1.410399  |
| 1  | 0 | -2.175246 | -4.385461 | 1.137071  |
| 1  | 0 | -0.872707 | -5.127976 | 2.106348  |
| 1  | 0 | -0.910989 | -3.347040 | 1.851217  |

MP2/BSS-C

Compound Model D (S, S)  
Symmetry C<sub>2</sub>  
energy MP2 = -1829.5581602 au  
Standard orientation

|    |   |           |          |           |
|----|---|-----------|----------|-----------|
| 16 | 0 | -0.004779 | 4.375512 | -0.215236 |
| 6  | 0 | 1.648002  | 3.936488 | -0.783142 |
| 1  | 0 | 2.344018  | 4.197981 | 0.017303  |
| 1  | 0 | 1.709069  | 2.861735 | -0.975127 |
| 1  | 0 | 1.904904  | 4.499661 | -1.684758 |
| 6  | 0 | -0.942748 | 3.834623 | -1.656668 |
| 1  | 0 | -1.995367 | 4.048161 | -1.455672 |
| 1  | 0 | -0.627992 | 4.386121 | -2.547133 |
| 1  | 0 | -0.814268 | 2.759198 | -1.807674 |
| 16 | 0 | 0.004779  | 1.020351 | 0.559049  |
| 6  | 0 | -1.182950 | 1.411477 | 1.871349  |
| 1  | 0 | -1.246563 | 2.502854 | 1.895125  |
| 1  | 0 | -0.824545 | 1.040149 | 2.833891  |



|    |   |           |           |           |
|----|---|-----------|-----------|-----------|
| 1  | 0 | -2.155977 | 0.977199  | 1.633816  |
| 16 | 0 | -0.004779 | -1.020351 | 0.559049  |
| 6  | 0 | 1.182950  | -1.411477 | 1.871349  |
| 1  | 0 | 1.246563  | -2.502854 | 1.895125  |
| 1  | 0 | 0.824545  | -1.040149 | 2.833891  |
| 1  | 0 | 2.155977  | -0.977199 | 1.633816  |
| 16 | 0 | 0.004779  | -4.375512 | -0.215236 |
| 6  | 0 | -1.648002 | -3.936488 | -0.783142 |
| 1  | 0 | -2.344018 | -4.197981 | 0.017303  |
| 1  | 0 | -1.709069 | -2.861735 | -0.975127 |
| 1  | 0 | -1.904904 | -4.499661 | -1.684758 |
| 6  | 0 | 0.942748  | -3.834623 | -1.656668 |
| 1  | 0 | 1.995367  | -4.048161 | -1.455672 |
| 1  | 0 | 0.627992  | -4.386121 | -2.547133 |
| 1  | 0 | 0.814268  | -2.759198 | -1.807674 |

MP2/BSS-C

Compound Model **D** (S, Se)  
Symmetry  $C_2$   
energy MP2 = -5834.3805116 au  
Standard orientation

|    |   |           |           |           |
|----|---|-----------|-----------|-----------|
| 34 | 0 | 0.026018  | 4.454379  | -0.166032 |
| 6  | 0 | 1.846485  | 3.915411  | -0.555540 |
| 1  | 0 | 2.461657  | 4.223944  | 0.292068  |
| 1  | 0 | 1.889133  | 2.829848  | -0.664001 |
| 1  | 0 | 2.193861  | 4.412553  | -1.463399 |
| 6  | 0 | -0.751942 | 3.757500  | -1.799680 |
| 1  | 0 | -1.821504 | 3.974721  | -1.765179 |
| 1  | 0 | -0.304777 | 4.252891  | -2.663808 |
| 1  | 0 | -0.595870 | 2.677715  | -1.842872 |
| 16 | 0 | -0.026018 | 1.020475  | 0.612828  |
| 6  | 0 | -1.225147 | 1.374405  | 1.925519  |
| 1  | 0 | -1.324326 | 2.463198  | 1.949019  |
| 1  | 0 | -0.854287 | 1.015207  | 2.887956  |
| 1  | 0 | -2.183666 | 0.908873  | 1.688231  |
| 16 | 0 | 0.026018  | -1.020475 | 0.612828  |
| 6  | 0 | 1.225147  | -1.374405 | 1.925519  |
| 1  | 0 | 1.324326  | -2.463198 | 1.949019  |
| 1  | 0 | 0.854287  | -1.015207 | 2.887956  |
| 1  | 0 | 2.183666  | -0.908873 | 1.688231  |
| 34 | 0 | -0.026018 | -4.454379 | -0.166032 |
| 6  | 0 | -1.846485 | -3.915411 | -0.555540 |
| 1  | 0 | -2.461657 | -4.223944 | 0.292068  |
| 1  | 0 | -1.889133 | -2.829848 | -0.664001 |
| 1  | 0 | -2.193861 | -4.412553 | -1.463399 |
| 6  | 0 | 0.751942  | -3.757500 | -1.799680 |
| 1  | 0 | 1.821504  | -3.974721 | -1.765179 |
| 1  | 0 | 0.304777  | -4.252891 | -2.663808 |
| 1  | 0 | 0.595870  | -2.677715 | -1.842872 |

MP2/BSS-C

Compound Model **D** (Se, S)  
Symmetry  $C_2$   
energy MP2 = -5834.3942751 au  
Standard orientation

|    |   |           |          |           |
|----|---|-----------|----------|-----------|
| 16 | 0 | -0.051484 | 4.513532 | -0.217264 |
| 6  | 0 | 1.421781  | 4.157784 | -1.191826 |
| 1  | 0 | 2.284740  | 4.304354 | -0.538203 |
| 1  | 0 | 1.404826  | 3.120512 | -1.539314 |
| 1  | 0 | 1.490906  | 4.840778 | -2.043099 |
| 6  | 0 | -1.299916 | 4.166189 | -1.471107 |
| 1  | 0 | -2.276252 | 4.339404 | -1.011855 |
| 1  | 0 | -1.180864 | 4.837359 | -2.326351 |

|    |   |           |           |           |
|----|---|-----------|-----------|-----------|
| 1  | 0 | -1.230579 | 3.122623  | -1.791398 |
| 34 | 0 | 0.051484  | 1.154987  | 0.352646  |
| 6  | 0 | -1.233825 | 1.515930  | 1.774179  |
| 1  | 0 | -1.272987 | 2.603409  | 1.873400  |
| 1  | 0 | -0.887706 | 1.063974  | 2.704715  |
| 1  | 0 | -2.207997 | 1.116150  | 1.490886  |
| 34 | 0 | -0.051484 | -1.154987 | 0.352646  |
| 6  | 0 | 1.233825  | -1.515930 | 1.774179  |
| 1  | 0 | 1.272987  | -2.603409 | 1.873400  |
| 1  | 0 | 0.887706  | -1.063974 | 2.704715  |
| 1  | 0 | 2.207997  | -1.116150 | 1.490886  |
| 16 | 0 | 0.051484  | -4.513532 | -0.217264 |
| 6  | 0 | -1.421781 | -4.157784 | -1.191826 |
| 1  | 0 | -2.284740 | -4.304354 | -0.538203 |
| 1  | 0 | -1.404826 | -3.120512 | -1.539314 |
| 1  | 0 | -1.490906 | -4.840778 | -2.043099 |
| 6  | 0 | 1.299916  | -4.166189 | -1.471107 |
| 1  | 0 | 2.276252  | -4.339404 | -1.011855 |
| 1  | 0 | 1.180864  | -4.837359 | -2.326351 |
| 1  | 0 | 1.230579  | -3.122623 | -1.791398 |

MP2/BSS-C

Compound

Model D (Se, Se)

Symmetry

C<sub>2</sub>

energy

MP2 = - 9839.2165615 au

Standard orientation

|    |   |           |           |           |
|----|---|-----------|-----------|-----------|
| 34 | 0 | -0.103719 | 4.575692  | -0.267441 |
| 6  | 0 | 1.152174  | 3.974659  | -1.615846 |
| 1  | 0 | 2.155075  | 4.187088  | -1.240267 |
| 1  | 0 | 1.034330  | 2.899428  | -1.767916 |
| 1  | 0 | 0.983833  | 4.518219  | -2.547614 |
| 6  | 0 | -1.702226 | 4.001260  | -1.203950 |
| 1  | 0 | -2.556127 | 4.256668  | -0.572784 |
| 1  | 0 | -1.782813 | 4.526435  | -2.157839 |
| 1  | 0 | -1.661889 | 2.920233  | -1.355797 |
| 34 | 0 | 0.110131  | 1.151097  | 0.513562  |
| 6  | 0 | -1.152174 | 1.576996  | 1.938136  |
| 1  | 0 | -1.129678 | 2.664473  | 2.044170  |
| 1  | 0 | -0.831358 | 1.100736  | 2.865664  |
| 1  | 0 | -2.148048 | 1.234909  | 1.654220  |
| 34 | 0 | -0.110131 | -1.151097 | 0.513562  |
| 6  | 0 | 1.152174  | -1.576996 | 1.938136  |
| 1  | 0 | 1.129678  | -2.664473 | 2.044170  |
| 1  | 0 | 0.831358  | -1.100736 | 2.865664  |
| 1  | 0 | 2.148048  | -1.234909 | 1.654220  |
| 34 | 0 | 0.103719  | -4.575692 | -0.267441 |
| 6  | 0 | -1.152174 | -3.974659 | -1.615846 |
| 1  | 0 | -2.155075 | -4.187088 | -1.240267 |
| 1  | 0 | -1.034330 | -2.899428 | -1.767916 |
| 1  | 0 | -0.983833 | -4.518219 | -2.547614 |
| 6  | 0 | 1.702226  | -4.001260 | -1.203950 |
| 1  | 0 | 2.556127  | -4.256668 | -0.572784 |
| 1  | 0 | 1.782813  | -4.526435 | -2.157839 |
| 1  | 0 | 1.661889  | -2.920233 | -1.355797 |
